# Supplementary material for: Network-Based Approach to Identify Potential Targets and Drugs that Promote Neuroprotection and Neurorepair in Acute Ischemic Stroke
Source: PubMed Central journal article supplement (PMC5215297; doi:10.1038/srep40137), 2017-01-05
Supplement: srep40137-s36.pdf [file srep40137-s36.pdf]

## **Network-Based Approach to Identify Potential Targets and Drugs that Promote Neuroprotection and Neurorepair in Acute Ischemic Stroke**

Yiwei Wang<sup>4+</sup>, Hailong Liu<sup>1+</sup>, Yongzhong Lin<sup>5+</sup>, Guangming Liu<sup>6</sup>, Hongwei Chu<sup>4</sup>, Pengyao Zhao<sup>6</sup>, Xiaohan Yang<sup>4</sup>, Tiezheng Zheng<sup>4</sup>, Ming Fan<sup>7</sup>, Xuezhong Zhou<sup>6,\*</sup>, Jun Meng<sup>8,\*</sup>, Changkai Sun<sup>1,2,3,4\*</sup>

<sup>+</sup>These authors contributed equally to this work.

<sup>1</sup>Department of Biomedical Engineering, Faculty of Electronic Information and Electrical Engineering, Dalian University of Technology, Dalian 116024, China

<sup>2</sup>Research Center for the Control Engineering of Translational Precision Medicine, Dalian University of Technology, Dalian 116024, China

<sup>3</sup>State Key Laboratory of Fine Chemicals, Dalian R&D Center for Stem Cell and Tissue Engineering, Dalian University of Technology, Dalian 116024, China

<sup>4</sup>Liaoning Provincial Key Laboratory of Cerebral Diseases, Institute for Brain Disorders, Dalian Medical University, Dalian 116044, China

<sup>5</sup>Department of Neurology, the Second Affiliated Hospital of Dalian Medical University, Dalian 116027, China

<sup>6</sup>School of Computer and Information Technology and Beijing Key Lab of Traffic Data Analysis and Mining, Beijing Jiaotong University, Beijing 100044, China

<sup>7</sup>Institute of Basic Medical Sciences, Academy of Military Medical Sciences, Beijing 100850, China

<sup>8</sup>College of Electrical engineering, Zhejiang University, Hangzhou 310027, China

### **\*Corresponding authors:**

Changkai Sun: cksun110@vip.sina.com

Xuezhong Zhou: xzzhou@bjtu.edu.cn

Jun Meng: junmeng@zju.edu.cn

## 1. Basic datasets compilation and preprocessing

The datasets used in our work include AIS MeSH headings, AIS disease-gene relationships, human protein-protein interactions and drug-target relationships. We will introduce the main compilation and preprocessing tasks in the following sections.

### 1.1 Disease-gene relationships

To identify the AIS related disease terms, we searched the Medical Subject Headings (MeSH, 2014 version) terminology database using the key words “stroke” and “infarction” on the MeSH Browser website (<https://www.nlm.nih.gov/mesh/MBrowser.html>) and ultimately confirmed (by the neurobiologists in our author list) 12 AIS related MeSH headings (**Table S1**)

With these 12 MeSH headings as disease keywords, we downloaded 1425 significant disease-gene associations ( $p < 0.05$ ) in batch mode from Coremine database<sup>1</sup>.

### 1.2 Curation of AIS disease-gene associations

Since we have downloaded all the related PubMed identifiers relevant to each disease-gene association, we manually checked the reliability of each disease-gene association by the several following key steps.

1) We ranked the related PubMed literatures of disease-gene associations in descending order by their publication date; 2) For each disease-gene associations, we manually checked each of the related PubMed literatures from the latest one. 3) If we find there are clear declarations in the literatures to indicate the disease-gene association is exactly positive, then the corresponding disease-gene association would be considered as reliable. 4) Otherwise, if we find clear indications to show that the disease-gene association is negative, then we would annotate the corresponding disease-gene association as false one. 5) If we cannot confirm from the current literature, we would go next literature, which is published earlier than the current one. When we go through all the PubMed literatures of a disease-gene association, but could not confirm whether it is true or not, we would exclude it from our final results as well. There are more than 4500 PubMed literatures been readed.

From PubMed literatures, we found out the sentences supporting or objecting to the disease-gene associations. If there is evidence supporting a disease-gene association, it will be a real relationship and gene in it is a credible gene. Finally, 1042 ( $1042/1425 = 73.12\%$ ) real relationships were confirmed

containing 606 distinct genes. To evaluate quality of our data, we checked two other well-known disease-gene association databases: OMIM<sup>2</sup>(<http://www.omim.org/>) and DiseaseConnect<sup>3</sup>(<http://disease-connect.org/>). We find that there are 9 AIS genotype-phenotype relationships containing 6 genes in the OMIM database and 3 disease-gene relationships with 2 genes in the DiseaseConnect database. It is interesting that all of these genes are included in our AIS disease-gene associations curated from CoreMine database. (**Data S1**)

### **1.3 Human protein-protein interactions**

Although with numerous curation efforts, human protein-protein interactome(PPI) data is incomplete. However, there are several integrated high quality PPI databases like STRING 9.1 database<sup>4</sup>(<http://www.string-db.org/>) that we could utilize. STRING 9 database is a comprehensive PPI data source developed by integrating various data sources of experimental, predicted and transferred interactions, together with interactions obtained through text mining. It contains about 5 million proteins and >200 million interactions. There is a confidence level of each interaction. The interactions whose score  $\geq 700$  have high confidence or better. We filtered to obtain the high quality human PPI records by the weighted score  $\geq 700$  and finally obtained 218,409 PPI records with 15,551 proteins.

### **1.4 AIS existing drugs-targets associations**

In recent years, the American College of Cardiology (ACC) and the American Heart Association (AHA) have classified ischemic stroke into the study of atherosclerotic cardiovascular disease events<sup>5</sup>. We obtained 87 known AIS drugs from the guideline designed by AHA and American Stroke Association (ASA) professionals<sup>6,7</sup>. Comprehensive information about these drugs was obtained from the DrugBank database<sup>8</sup>( <http://www.drugbank.ca/>). And there are totally 161 targets of these drugs. (**Table S2**)

## **2 Detection of PPI topological modules**

Community structures are widely existed in complex network, for each community it comprises of nodes that are densely connected among its members and sparsely connected with nodes in other modules<sup>9</sup>. There are various community detection algorithms that can be used for identifying the topological modules from large-scale network. We used the widely used algorithm (called BGLL)<sup>10</sup>, which is based on modularity evaluation, to obtain the

topological modules of the whole PPI network. Because BGLL would get some modules with very large (e.g. several thousand) member nodes, we iteratively divided the modules by BGLL and finally obtained the topological modules with the number of member nodes between 5 and 400. However, different community detection algorithms would exactly obtain different results. Therefore, to validate the possible influence to our results, we performed another network partition method based on NMF algorithm to get the similar number of communities for comparison.

We identified 301 modules from String 9.1 PPI network. We assumed that if the module results are similar, we could find similar communities from another module set for a given module in one module set. Therefore, we calculated the Jaccard similarity between each pairs of modules derived from two module sets. Then we calculated the module similarity distribution. The similarities of 78.095% modules are more than 0.6(Figure S1). So there is no significant differences between these two therapies.

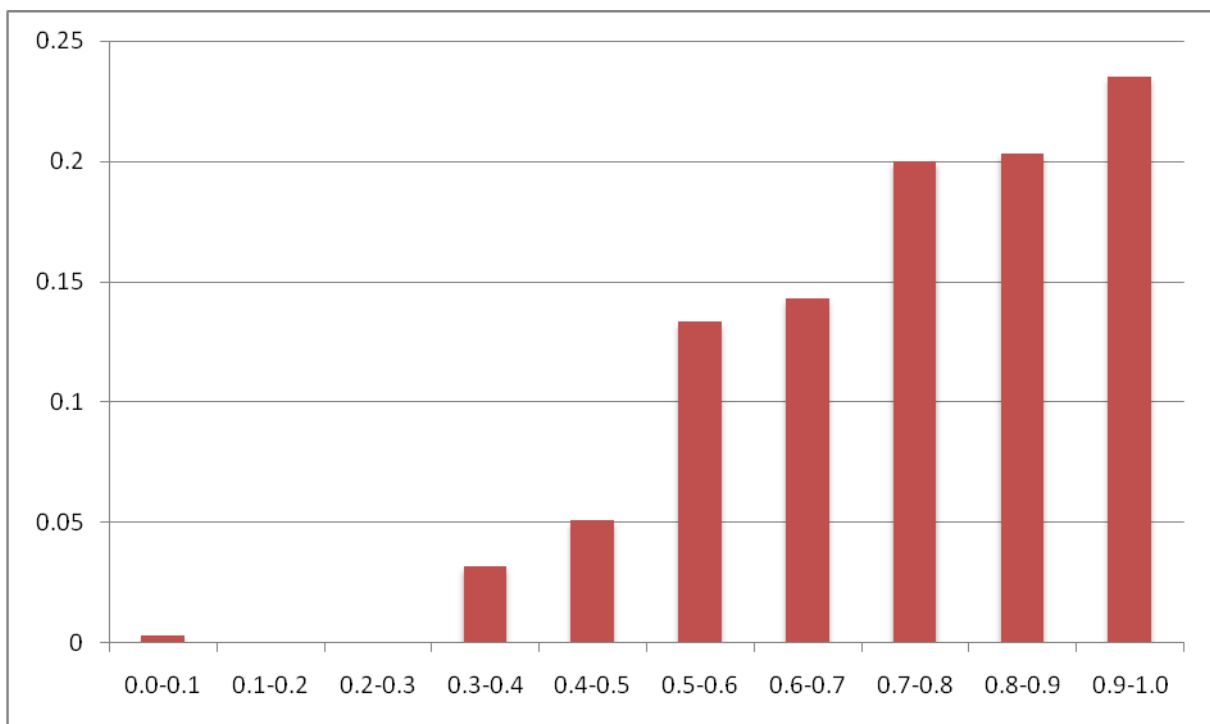

Figure S1. Jaccard similarity between different modules results.

We counted the number of disease genes in each module and calculate OR (Odds Ratio). Assume that there are  $A$  disease genes in the whole PPI network and distribute in many modules in which there totally are  $M$  nodes. If there are  $a$  disease genes in a module which has  $m$  nodes, then the OR of this module is:

$$OR = \frac{a/(m - a)}{A/(M - A)}, (1)$$

There are 71 modules whose  $OR > 1.0$  and 29 modules whose  $OR > 2.0$ . In the **Data S2**, there are the nodes information of the 29 modules.

### 3 GO enrichment analysis

The GeneOntology database<sup>11</sup> provides three different types of annotations for proteins: biological process, molecular function, and cellular component. GO enrichment analysis can define gene groups based on the categories in the GeneOntology database<sup>12</sup>. With the plugin BiNGO 2.44 of Cytoscape 2.8.2<sup>13, 14</sup>, an open-source software platform for visualizing molecular interaction networks, we analyzed the disease genes, existing drug targets, and proteins in the modules. And the statistical test is Hypergeometric test and Benjamini & Hochberg False Discovery Rate (FDR) correction to gain a corrected P-value. The significance level is 0.05.

In the result of AIS credible genes, there are 1392 Biological process terms, 216 Molecular function terms and 108 Cellular component terms. Here we list part of them. (**Table S3-S5, Data S3**)

In the GO enrichment analysis result of AIS existing drug targets, there are 860 Biological process terms, 213 Molecular function terms and 88 Cellular component terms. (**Data S4**)

The GO analysis result of 29 modules ( $OR > 2$ ) are showed in **Data S5**.

### 4 Pathway enrichment analysis

Pathway analysis has become a vitally important method for gaining insight into the underlying biological functions of genes and proteins. The Reactome database is a manually curated open-source and open-data resource of human pathways. We obtained the enriched Reactome pathways using the KOBAS2.0 online software<sup>15</sup>(<http://kobas.cbi.pku.edu.cn/home.do>). In the pathway analysis result of AIS credible genes, there are 84 enriched pathways. All of them are listed in **Table S6**. And enriched pathways of AIS existing drug targets (Data S6) and 29 modules( $OR > 2$ ) are showed in **Data S7**.

## 5 Shortest paths between drug targets and seed genes

The shortest paths are a significant topological statistical quantity used for the analysis of social and biological networks. The most outstanding example of its use is likely to be the well-known small world property of many complex networks<sup>16</sup>. We used the Dijkstra's algorithm to find the shortest path lengths between AIS drug targets and credible genes<sup>17</sup>. To obtain random controls for the target-gene, we generated 100 independent randomized samples in the PPI network. Significant difference was calculated statistically using t-test analysis. In PPI network, the hubs is not suitable for AIS treatment<sup>18</sup>. However the shortest paths analysis result showed that the distances between AIS drug targets and credible genes are enriched at the low range distances (i.e.  $\leq 1$ ). This means that existing AIS drugs regulate disease by targeting disease genes directly or neighbors of AIS genes. Otherwise we calculated the degrees of AIS related drug targets in which degrees of more than 45% targets are bigger than 50. It is statistically higher than those of the whole PPI network (Table S7).

## 6 Analysis of potential targets

### 6.1 Potential targets in M64

In M64, there are 184 nodes containing 21 AIS genes and 57 drug targets in DrugBank database. Proteins in it are enriched in 81 Reactome pathways. Here we list the top 20 pathways containing 7 pathways shared with the result of AIS credible genes (Table S8 and Table S9). Between these 7 pathways, there is an including and included relationship (Figure S2). With the pathway "Unblocking of NMDA receptor, glutamate binding and activation", we identified 9 potential targets whose length from AIS genes is  $\leq 1$ .

### 6.2 Analysis of M145

In M64, there are 145 nodes containing 9 AIS genes and 47 drug targets in Drugbank. Proteins in it are enriched in 28 Reactome pathways. And 20 pathways are shared with the result of AIS credible genes (Table S10). The most enriched pathway "G Alpha (i) Signaling Events" is at the bottom of the pathway tree. There are 14 potential targets on this pathway. The distances between them and AIS genes are 0 or 1.

## 7 Potential Drugs

With the potential targets in M64 and M145, we screened out some drugs from DrugBank database.

With the analysis of M64, we found out 21 potential drugs. Otherwise, 25 potential drugs were based on the analysis of M145. All of them are showed in **Table S11**.

**Table S1. Acute ischemic stroke–related MeSH headings.**

| <b>Unique ID</b> | <b>Unidentified MeSH headings</b> | <b>Identified MeSH headings</b> | <b>Scope Note</b>                                                                                                                                                                                                                                                                                                                                            |
|------------------|-----------------------------------|---------------------------------|--------------------------------------------------------------------------------------------------------------------------------------------------------------------------------------------------------------------------------------------------------------------------------------------------------------------------------------------------------------|
| D002544          | Cerebral Infarction               | Cerebral Infarction             | The formation of an area of necrosis in the cerebrum caused by an insufficiency of arterial or venous blood flow. Infarcts of the cerebrum are generally classified by hemisphere (i.e., left vs. right), lobe (e.g., frontal lobe infarction), arterial distribution (e.g., infarction, anterior cerebral artery), and etiology (e.g., embolic infarction). |
| D020767          | Intracranial Thrombosis           | Intracranial Thrombosis         | Formation or presence of a blood clot ( thrombus) in a blood vessel within the SKULL. Intracranial thrombosis can lead to thrombotic occlusions and brain infarction. The majority of the thrombotic occlusions are associated with arterosclerosis.                                                                                                         |
| D020766          | Intracranial Embolism             | Intracranial Embolism           | Blocking of a blood vessel in the skull by an embolus which can be a blood clot ( thrombus) or other undissolved material in the blood stream. Most emboli are of cardiac origin and are associated with heart diseases. Other non-cardiac sources of emboli are usually associated with vascular diseases.                                                  |

|         |                                       |                                       |                                                                                                                                                                                                                                                                                                                      |
|---------|---------------------------------------|---------------------------------------|----------------------------------------------------------------------------------------------------------------------------------------------------------------------------------------------------------------------------------------------------------------------------------------------------------------------|
| D002542 | Intracranial Embolism and Thrombosis  | Intracranial Embolism and Thrombosis  | Embolism or thrombosis involving blood vessels which supply intracranial structures. Emboli may originate from extracranial or intracranial sources. Thrombosis may occur in arterial or venous structures.                                                                                                          |
| D020243 | Infarction, Anterior Cerebral Artery  | Infarction, Anterior Cerebral Artery  | necrosis occurring in the anterior cerebral artery system, including branches such as Heubner's artery. These arteries supply blood to the medial and superior parts of the cerebral hemisphere, Infarction in the anterior cerebral artery usually results in sensory and motor impairment in the lower body.       |
| D020244 | Infarction, Middle Cerebral Artery    | Infarction, Middle Cerebral Artery    | necrosis occurring in the middle cerebral artery distribution system which brings blood to the entire lateral aspects of each cerebral hemisphere. Clinical signs include impaired cognition; aphasia; agraphia; weak and numbness in the face and arms, contralaterally or bilaterally depending on the infarction. |
| D020762 | Infarction, Posterior Cerebral Artery | Infarction, Posterior Cerebral Artery | Necrosis induced by ischemia in the posterior cerebral artery distribution system which supplies portions of the brain stem; the thalamus; temporal lobe, and occipital lobe. Depending on the size and location of infarction, clinical features include olfaction disorders and visual problems.                   |
| D002546 | Ischemic Attack, Transient            | Ischemic Attack, Transient            | Brief reversible episodes of focal, nonconvulsive ischemic dysfunction of the brain having a duration of less than 24 hours, and usually less                                                                                                                                                                        |



|         |                             |                             |                                                                                                                                                                                                                                                                                                                                                                                                                                                                                                           |
|---------|-----------------------------|-----------------------------|-----------------------------------------------------------------------------------------------------------------------------------------------------------------------------------------------------------------------------------------------------------------------------------------------------------------------------------------------------------------------------------------------------------------------------------------------------------------------------------------------------------|
|         |                             |                             | <p>than one hour, caused by transient thrombotic or embolic blood vessel occlusion or stenosis. Events may be classified by arterial distribution, temporal pattern, or etiology</p>                                                                                                                                                                                                                                                                                                                      |
| D046589 | CADASIL                     | CADASIL                     | <p>A familial, cerebral arteriopathy mapped to chromosome 19q12, and characterized by the presence of granular deposits in small cerebral arteries producing ischemic stroke; pseudobulbar palsy; and multiple subcortical infarcts. CADASIL is an acronym for Cerebral Autosomal Dominant Arteriopathy with Subcortical Infarcts and Leukoencephalopathy. CADASIL differs from binswanger disease by the presence of migraine with aura and usually by the lack of history of arterial hypertension.</p> |
| D020925 | Hypoxia-<br>Ischemia, Brain | Hypoxia-<br>Ischemia, Brain | <p>A disorder characterized by a reduction of oxygen in the blood combined with reduced blood flow (ischemia) to the brain from a localized obstruction of a cerebral artery or from systemic hypoperfusion. Prolonged hypoxia-ischemia is associated with ischemic attack, transient; brain infarction; brain edema; coma; and other conditions.</p>                                                                                                                                                     |
| D059409 | Stroke, Lacunar             | Stroke, Lacunar             | <p>Stroke caused by lacunar infarction or other small vessel diseases of the brain. It features hemiparesis, hemisensory, or hemisensory motor loss.</p>                                                                                                                                                                                                                                                                                                                                                  |

|         |                |                |                                                                                                                                                                                                                            |
|---------|----------------|----------------|----------------------------------------------------------------------------------------------------------------------------------------------------------------------------------------------------------------------------|
| D002545 | Brain Ischemia | Brain Ischemia | Localized reduction of blood flow to brain tissue due to arterial obstruction or systemic hypoperfusion. This frequently occurs in conjunction with brain hypoxia. Prolonged ischemia is associated with brain infarction. |
| D020521 | Stroke         |                |                                                                                                                                                                                                                            |

**Table S2. AIS existing Drug-target associations. There are 292 associations between 87 drugs and 161 targets.**

| DrugID  | Drug name | Groups                               | Target   |
|---------|-----------|--------------------------------------|----------|
| DB00009 | Alteplase | Approved                             | SERPINE1 |
| DB00009 | Alteplase | Approved                             | PLG      |
| DB00009 | Alteplase | Approved                             | FGA      |
| DB00009 | Alteplase | Approved                             | PLAUR    |
| DB00013 | Urokinase | Approved, Investigational, Withdrawn | SERPINE1 |
| DB00013 | Urokinase | Approved, Investigational, Withdrawn | PLG      |
| DB00013 | Urokinase | Approved, Investigational, Withdrawn | PLAUR    |
| DB00013 | Urokinase | Approved, Investigational, Withdrawn | PLAU     |
| DB00013 | Urokinase | Approved, Investigational, Withdrawn | LRP2     |
| DB00013 | Urokinase | Approved, Investigational, Withdrawn | SERPINB2 |
| DB00013 | Urokinase | Approved, Investigational, Withdrawn | PLAT     |
| DB00013 | Urokinase | Approved, Investigational, Withdrawn | ST14     |
| DB00013 | Urokinase | Approved, Investigational, Withdrawn | SERPINA5 |
| DB00013 | Urokinase | Approved, Investigational, Withdrawn | NID1     |
| DB00015 | Retepase  | Approved                             | SERPINE1 |
| DB00015 | Retepase  | Approved                             | PLG      |
| DB00015 | Retepase  | Approved                             | FGA      |

|                |                        |                           |          |
|----------------|------------------------|---------------------------|----------|
| <b>DB00015</b> | Reteplase              | Approved                  | PLAUR    |
| <b>DB00029</b> | Anistreplase           | Approved                  | SERPINE1 |
| <b>DB00029</b> | Anistreplase           | Approved                  | PLG      |
| <b>DB00029</b> | Anistreplase           | Approved                  | FGA      |
| <b>DB00029</b> | Anistreplase           | Approved                  | PLAUR    |
| <b>DB00031</b> | Tenecteplase           | Approved                  | SERPINE1 |
| <b>DB00031</b> | Tenecteplase           | Approved                  | PLG      |
| <b>DB00031</b> | Tenecteplase           | Approved                  | CANX     |
| <b>DB00031</b> | Tenecteplase           | Approved                  | FGA      |
| <b>DB00031</b> | Tenecteplase           | Approved                  | PLAUR    |
| <b>DB00031</b> | Tenecteplase           | Approved                  | SERPINB2 |
| <b>DB00031</b> | Tenecteplase           | Approved                  | ANXA2    |
| <b>DB00031</b> | Tenecteplase           | Approved                  | CLEC3B   |
| <b>DB00031</b> | Tenecteplase           | Approved                  | KRT8     |
| <b>DB00031</b> | Tenecteplase           | Approved                  | CALR     |
| <b>DB00031</b> | Tenecteplase           | Approved                  | LRP1     |
| <b>DB00062</b> | Human Serum<br>Albumin | Approved                  | AMBP     |
| <b>DB00062</b> | Human Serum<br>Albumin | Approved                  | APOE     |
| <b>DB00062</b> | Human Serum<br>Albumin | Approved                  | SAA1     |
| <b>DB00063</b> | Eptifibatide           | Approved, Investigational | ITGB3    |
| <b>DB00115</b> | Cyanocobalamin         | Approved, Nutraceutical   | MMAA     |
| <b>DB00115</b> | Cyanocobalamin         | Approved, Nutraceutical   | MTR      |
| <b>DB00115</b> | Cyanocobalamin         | Approved, Nutraceutical   | MTRR     |
| <b>DB00115</b> | Cyanocobalamin         | Approved, Nutraceutical   | MUT      |
| <b>DB00115</b> | Cyanocobalamin         | Approved, Nutraceutical   | MMACHC   |
| <b>DB00115</b> | Cyanocobalamin         | Approved, Nutraceutical   | MTHFR    |

|                |                |                           |          |
|----------------|----------------|---------------------------|----------|
| <b>DB00158</b> | Folic Acid     | Approved, Nutraceutical   | FOLR2    |
| <b>DB00158</b> | Folic Acid     | Approved, Nutraceutical   | FOLR3    |
| <b>DB00165</b> | Pyridoxine     | Approved, Nutraceutical   | PDXX     |
| <b>DB00175</b> | Pravastatin    | Approved                  | HMGCR    |
| <b>DB00178</b> | Ramipril       | Approved                  | ACE      |
| <b>DB00208</b> | Ticlopidine    | Approved                  | P2RY12   |
| <b>DB00214</b> | Torasemide     | Approved                  | SLC12A1  |
| <b>DB00227</b> | Lovastatin     | Approved, Investigational | ITGAL    |
| <b>DB00227</b> | Lovastatin     | Approved, Investigational | HMGCR    |
| <b>DB00227</b> | Lovastatin     | Approved, Investigational | HDAC2    |
| <b>DB00270</b> | Isradipine     | Approved                  | CACNA2D1 |
| <b>DB00270</b> | Isradipine     | Approved                  | CACNA1H  |
| <b>DB00270</b> | Isradipine     | Approved                  | CACNA1C  |
| <b>DB00270</b> | Isradipine     | Approved                  | CACNB2   |
| <b>DB00270</b> | Isradipine     | Approved                  | CACNA1S  |
| <b>DB00270</b> | Isradipine     | Approved                  | CACNA1D  |
| <b>DB00270</b> | Isradipine     | Approved                  | CACNA2D2 |
| <b>DB00278</b> | Argatroban     | Approved, Investigational | F2       |
| <b>DB00310</b> | Chlorthalidone | Approved                  | SLC12A1  |
| <b>DB00316</b> | Acetaminophen  | Approved                  | PTGS2    |
| <b>DB00316</b> | Acetaminophen  | Approved                  | PTGS1    |
| <b>DB00368</b> | Norepinephrine | Approved                  | ADRB1    |
| <b>DB00368</b> | Norepinephrine | Approved                  | ADRA2A   |
| <b>DB00368</b> | Norepinephrine | Approved                  | ADRA2C   |
| <b>DB00368</b> | Norepinephrine | Approved                  | ADRB3    |
| <b>DB00368</b> | Norepinephrine | Approved                  | ADRB2    |
| <b>DB00368</b> | Norepinephrine | Approved                  | ADRA1D   |
| <b>DB00368</b> | Norepinephrine | Approved                  | ADRA2B   |
| <b>DB00368</b> | Norepinephrine | Approved                  | ADRA1B   |

|                |                     |                           |         |
|----------------|---------------------|---------------------------|---------|
| <b>DB00368</b> | Norepinephrine      | Approved                  | PAH     |
| <b>DB00368</b> | Norepinephrine      | Approved                  | ADRA1A  |
| <b>DB00384</b> | Triamterene         | Approved                  | SCNN1B  |
| <b>DB00384</b> | Triamterene         | Approved                  | SCNN1A  |
| <b>DB00384</b> | Triamterene         | Approved                  | SCNN1D  |
| <b>DB00384</b> | Triamterene         | Approved                  | SCNN1G  |
| <b>DB00388</b> | Phenylephrine       | Approved                  | ADRA1D  |
| <b>DB00388</b> | Phenylephrine       | Approved                  | ADRA1B  |
| <b>DB00388</b> | Phenylephrine       | Approved                  | ADRA1A  |
| <b>DB00393</b> | Nimodipine          | Approved                  | CACNB1  |
| <b>DB00393</b> | Nimodipine          | Approved                  | CACNA1C |
| <b>DB00393</b> | Nimodipine          | Approved                  | NR3C2   |
| <b>DB00393</b> | Nimodipine          | Approved                  | CACNB2  |
| <b>DB00393</b> | Nimodipine          | Approved                  | CACNA1S |
| <b>DB00393</b> | Nimodipine          | Approved                  | CACNB4  |
| <b>DB00393</b> | Nimodipine          | Approved                  | CACNA1F |
| <b>DB00393</b> | Nimodipine          | Approved                  | CACNB3  |
| <b>DB00393</b> | Nimodipine          | Approved                  | CACNA1D |
| <b>DB00393</b> | Nimodipine          | Approved                  | AHR     |
| <b>DB00421</b> | Spironolactone      | Approved                  | AR      |
| <b>DB00421</b> | Spironolactone      | Approved                  | NR3C2   |
| <b>DB00436</b> | Bendroflumethiazide | Approved                  | CA1     |
| <b>DB00436</b> | Bendroflumethiazide | Approved                  | CA2     |
| <b>DB00436</b> | Bendroflumethiazide | Approved                  | CA4     |
| <b>DB00436</b> | Bendroflumethiazide | Approved                  | KCNMA1  |
| <b>DB00436</b> | Bendroflumethiazide | Approved                  | SLC12A3 |
| <b>DB00519</b> | Trandolapril        | Approved                  | ACE     |
| <b>DB00524</b> | Metolazone          | Approved                  | SLC12A3 |
| <b>DB00542</b> | Benazepril          | Approved, Investigational | ACE     |

|                |               |          |          |
|----------------|---------------|----------|----------|
| <b>DB00584</b> | Enalapril     | Approved | ACE      |
| <b>DB00594</b> | Amiloride     | Approved | SCNN1B   |
| <b>DB00594</b> | Amiloride     | Approved | SCNN1A   |
| <b>DB00594</b> | Amiloride     | Approved | ABP1     |
| <b>DB00594</b> | Amiloride     | Approved | ACCN2    |
| <b>DB00594</b> | Amiloride     | Approved | ACCN1    |
| <b>DB00594</b> | Amiloride     | Approved | PLAU     |
| <b>DB00594</b> | Amiloride     | Approved | SLC9A1   |
| <b>DB00594</b> | Amiloride     | Approved | SCNN1D   |
| <b>DB00594</b> | Amiloride     | Approved | SCNN1G   |
| <b>DB00606</b> | Cyclothiazide | Approved | FXD2     |
| <b>DB00606</b> | Cyclothiazide | Approved | CA1      |
| <b>DB00606</b> | Cyclothiazide | Approved | CA2      |
| <b>DB00606</b> | Cyclothiazide | Approved | CA4      |
| <b>DB00622</b> | Nicardipine   | Approved | CHRM1    |
| <b>DB00622</b> | Nicardipine   | Approved | CHRM3    |
| <b>DB00622</b> | Nicardipine   | Approved | CHRM5    |
| <b>DB00622</b> | Nicardipine   | Approved | CHRM4    |
| <b>DB00622</b> | Nicardipine   | Approved | CACNA2D1 |
| <b>DB00622</b> | Nicardipine   | Approved | ADRA1D   |
| <b>DB00622</b> | Nicardipine   | Approved | CALM1    |
| <b>DB00622</b> | Nicardipine   | Approved | CHRM2    |
| <b>DB00622</b> | Nicardipine   | Approved | CACNA1C  |
| <b>DB00622</b> | Nicardipine   | Approved | ADRA1B   |
| <b>DB00622</b> | Nicardipine   | Approved | ADRA1A   |
| <b>DB00622</b> | Nicardipine   | Approved | CACNB2   |
| <b>DB00622</b> | Nicardipine   | Approved | CACNA1D  |
| <b>DB00622</b> | Nicardipine   | Approved | PDE1A    |
| <b>DB00622</b> | Nicardipine   | Approved | PDE1B    |

|                |                    |                           |          |
|----------------|--------------------|---------------------------|----------|
| <b>DB00641</b> | Simvastatin        | Approved                  | ITGB2    |
| <b>DB00641</b> | Simvastatin        | Approved                  | HMGCR    |
| <b>DB00653</b> | Magnesium Sulfate  | Approved                  | CACNB1   |
| <b>DB00653</b> | Magnesium Sulfate  | Approved                  | CACNG1   |
| <b>DB00653</b> | Magnesium Sulfate  | Approved                  | CACNA2D1 |
| <b>DB00653</b> | Magnesium Sulfate  | Approved                  | CACNA1C  |
| <b>DB00653</b> | Magnesium Sulfate  | Approved                  | CACNB2   |
| <b>DB00653</b> | Magnesium Sulfate  | Approved                  | CACNA1S  |
| <b>DB00682</b> | Warfarin           | Approved                  | VKORC1   |
| <b>DB00691</b> | Moexipril          | Approved                  | ACE      |
| <b>DB00691</b> | Moexipril          | Approved                  | ACE2     |
| <b>DB00695</b> | Furosemide         | Approved                  | CA2      |
| <b>DB00695</b> | Furosemide         | Approved                  | SLC12A1  |
| <b>DB00758</b> | Clopidogrel        | Approved, Nutraceutical   | P2RY12   |
| <b>DB00774</b> | Hydroflumethiazide | Approved                  | CA1      |
| <b>DB00774</b> | Hydroflumethiazide | Approved                  | CA2      |
| <b>DB00774</b> | Hydroflumethiazide | Approved                  | CA4      |
| <b>DB00774</b> | Hydroflumethiazide | Approved                  | KCNMA1   |
| <b>DB00774</b> | Hydroflumethiazide | Approved                  | ATP1A1   |
| <b>DB00774</b> | Hydroflumethiazide | Approved                  | SLC12A1  |
| <b>DB00774</b> | Hydroflumethiazide | Approved                  | CA12     |
| <b>DB00774</b> | Hydroflumethiazide | Approved                  | CA9      |
| <b>DB00775</b> | Tirofiban          | Approved                  | ITGA2B   |
| <b>DB00775</b> | Tirofiban          | Approved                  | ITGB3    |
| <b>DB00790</b> | Perindopril        | Approved                  | ACE      |
| <b>DB00796</b> | Candesartan        | Approved                  | AGTR1    |
| <b>DB00806</b> | Pentoxifylline     | Approved, Investigational | ADORA1   |
| <b>DB00806</b> | Pentoxifylline     | Approved, Investigational | PDE5A    |
| <b>DB00806</b> | Pentoxifylline     | Approved, Investigational | ADORA2A  |

|                |                |                           |        |
|----------------|----------------|---------------------------|--------|
| <b>DB00806</b> | Pentoxifylline | Approved, Investigational | PDE4B  |
| <b>DB00806</b> | Pentoxifylline | Approved, Investigational | NT5E   |
| <b>DB00806</b> | Pentoxifylline | Approved, Investigational | PDE4A  |
| <b>DB00808</b> | Indapamide     | Approved                  | KCNQ1  |
| <b>DB00808</b> | Indapamide     | Approved                  | KCNE1  |
| <b>DB00819</b> | Acetazolamide  | Approved                  | CA1    |
| <b>DB00819</b> | Acetazolamide  | Approved                  | CA2    |
| <b>DB00819</b> | Acetazolamide  | Approved                  | CA4    |
| <b>DB00819</b> | Acetazolamide  | Approved                  | AQP1   |
| <b>DB00819</b> | Acetazolamide  | Approved                  | CA3    |
| <b>DB00819</b> | Acetazolamide  | Approved                  | CA7    |
| <b>DB00819</b> | Acetazolamide  | Approved                  | CA14   |
| <b>DB00829</b> | Diazepam       | Approved, Illicit         | GABRR1 |
| <b>DB00829</b> | Diazepam       | Approved, Illicit         | GABRA2 |
| <b>DB00829</b> | Diazepam       | Approved, Illicit         | GABRA3 |
| <b>DB00829</b> | Diazepam       | Approved, Illicit         | TSPO   |
| <b>DB00829</b> | Diazepam       | Approved, Illicit         | GABRA5 |
| <b>DB00829</b> | Diazepam       | Approved, Illicit         | GABRA1 |
| <b>DB00829</b> | Diazepam       | Approved, Illicit         | GABRB1 |
| <b>DB00829</b> | Diazepam       | Approved, Illicit         | GABRB3 |
| <b>DB00829</b> | Diazepam       | Approved, Illicit         | GABRB2 |
| <b>DB00829</b> | Diazepam       | Approved, Illicit         | GABRG2 |
| <b>DB00829</b> | Diazepam       | Approved, Illicit         | GABRG1 |
| <b>DB00829</b> | Diazepam       | Approved, Illicit         | GABRG3 |
| <b>DB00829</b> | Diazepam       | Approved, Illicit         | GABRE  |
| <b>DB00829</b> | Diazepam       | Approved, Illicit         | GABRP  |
| <b>DB00829</b> | Diazepam       | Approved, Illicit         | GABRQ  |
| <b>DB00829</b> | Diazepam       | Approved, Illicit         | GABRR2 |
| <b>DB00829</b> | Diazepam       | Approved, Illicit         | GABRD  |



|                |                      |                           |         |
|----------------|----------------------|---------------------------|---------|
| <b>DB00829</b> | Diazepam             | Approved, Illicit         | GABRR3  |
| <b>DB00876</b> | Eprosartan           | Approved                  | AGTR1   |
| <b>DB00880</b> | Chlorothiazide       | Approved                  | CA1     |
| <b>DB00880</b> | Chlorothiazide       | Approved                  | CA2     |
| <b>DB00880</b> | Chlorothiazide       | Approved                  | CA4     |
| <b>DB00880</b> | Chlorothiazide       | Approved                  | SLC12A3 |
| <b>DB00881</b> | Quinapril            | Approved, Investigational | ACE     |
| <b>DB00887</b> | Bumetanide           | Approved                  | SLC12A5 |
| <b>DB00887</b> | Bumetanide           | Approved                  | SLC12A2 |
| <b>DB00887</b> | Bumetanide           | Approved                  | SLC12A4 |
| <b>DB00887</b> | Bumetanide           | Approved                  | SLC12A1 |
| <b>DB00887</b> | Bumetanide           | Approved                  | CFTR    |
| <b>DB00903</b> | Ethacrynic acid      | Approved                  | ATP1A1  |
| <b>DB00903</b> | Ethacrynic acid      | Approved                  | SLC12A1 |
| <b>DB00945</b> | Acetylsalicylic acid | Approved                  | AKR1C1  |
| <b>DB00945</b> | Acetylsalicylic acid | Approved                  | PTGS2   |
| <b>DB00945</b> | Acetylsalicylic acid | Approved                  | PTGS1   |
| <b>DB00975</b> | Dipyridamole         | Approved                  | PDE5A   |
| <b>DB00975</b> | Dipyridamole         | Approved                  | PDE10A  |
| <b>DB00975</b> | Dipyridamole         | Approved                  | PDE4A   |
| <b>DB00975</b> | Dipyridamole         | Approved                  | ADA     |
| <b>DB00999</b> | Hydrochlorothiazide  | Approved                  | CA1     |
| <b>DB00999</b> | Hydrochlorothiazide  | Approved                  | CA2     |
| <b>DB00999</b> | Hydrochlorothiazide  | Approved                  | CA4     |
| <b>DB00999</b> | Hydrochlorothiazide  | Approved                  | KCNMA1  |
| <b>DB00999</b> | Hydrochlorothiazide  | Approved                  | SLC12A3 |
| <b>DB00999</b> | Hydrochlorothiazide  | Approved                  | CA12    |
| <b>DB00999</b> | Hydrochlorothiazide  | Approved                  | CA9     |
| <b>DB01021</b> | Trichlormethiazide   | Approved                  | CA1     |

|                |                    |                           |          |
|----------------|--------------------|---------------------------|----------|
| <b>DB01021</b> | Trichlormethiazide | Approved                  | CA2      |
| <b>DB01021</b> | Trichlormethiazide | Approved                  | CA4      |
| <b>DB01021</b> | Trichlormethiazide | Approved                  | ATP1A1   |
| <b>DB01021</b> | Trichlormethiazide | Approved                  | SLC12A1  |
| <b>DB01029</b> | Irbesartan         | Approved, Investigational | AGTR1    |
| <b>DB01029</b> | Irbesartan         | Approved, Investigational | JUN      |
| <b>DB01050</b> | Ibuprofen          | Approved                  | PTGS1    |
| <b>DB01050</b> | Ibuprofen          | Approved                  | PPARG    |
| <b>DB01050</b> | Ibuprofen          | Approved                  | BCL2     |
| <b>DB01050</b> | Ibuprofen          | Approved                  | PTGS2    |
| <b>DB01050</b> | Ibuprofen          | Approved                  | CFTR     |
| <b>DB01050</b> | Ibuprofen          | Approved                  | PLAT     |
| <b>DB01050</b> | Ibuprofen          | Approved                  | THBD     |
| <b>DB01050</b> | Ibuprofen          | Approved                  | FABP2    |
| <b>DB01054</b> | Nitrendipine       | Approved                  | CACNG1   |
| <b>DB01054</b> | Nitrendipine       | Approved                  | CACNA2D1 |
| <b>DB01054</b> | Nitrendipine       | Approved                  | CACNA1H  |
| <b>DB01054</b> | Nitrendipine       | Approved                  | CACNA1C  |
| <b>DB01054</b> | Nitrendipine       | Approved                  | CACNB2   |
| <b>DB01054</b> | Nitrendipine       | Approved                  | CACNA1S  |
| <b>DB01054</b> | Nitrendipine       | Approved                  | CACNA1D  |
| <b>DB01054</b> | Nitrendipine       | Approved                  | CACNA2D2 |
| <b>DB01076</b> | Atorvastatin       | Approved                  | DPP4     |
| <b>DB01076</b> | Atorvastatin       | Approved                  | HMGCR    |
| <b>DB01076</b> | Atorvastatin       | Approved                  | AHR      |
| <b>DB01095</b> | Fluvastatin        | Approved                  | HMGCR    |
| <b>DB01098</b> | Rosuvastatin       | Approved                  | HMGCR    |
| <b>DB01109</b> | Heparin            | Approved, Investigational | F10      |
| <b>DB01109</b> | Heparin            | Approved, Investigational | SERPINC1 |

|                |                      |                           |          |
|----------------|----------------------|---------------------------|----------|
| <b>DB01109</b> | Heparin              | Approved, Investigational | SELP     |
| <b>DB01166</b> | Cilostazol           | Approved                  | PDE3A    |
| <b>DB01183</b> | Naloxone             | Approved                  | ESR1     |
| <b>DB01183</b> | Naloxone             | Approved                  | OPRD1    |
| <b>DB01183</b> | Naloxone             | Approved                  | OPRM1    |
| <b>DB01183</b> | Naloxone             | Approved                  | CREB1    |
| <b>DB01183</b> | Naloxone             | Approved                  | OPRK1    |
| <b>DB01183</b> | Naloxone             | Approved                  | TLR4     |
| <b>DB01197</b> | Captopril            | Approved                  | MMP9     |
| <b>DB01197</b> | Captopril            | Approved                  | ACE      |
| <b>DB01197</b> | Captopril            | Approved                  | MMP2     |
| <b>DB01225</b> | Enoxaparin           | Approved                  | F10      |
| <b>DB01225</b> | Enoxaparin           | Approved                  | SERPINC1 |
| <b>DB01340</b> | Cilazapril           | Approved                  | ACE      |
| <b>DB01599</b> | Probucol             | Approved                  | ABCA1    |
| <b>DB01599</b> | Probucol             | Approved                  | CES1     |
| <b>DB04841</b> | Flunarizine          | Approved                  | CACNA1I  |
| <b>DB04841</b> | Flunarizine          | Approved                  | CACNA1H  |
| <b>DB04841</b> | Flunarizine          | Approved                  | CALM1    |
| <b>DB04841</b> | Flunarizine          | Approved                  | HRH1     |
| <b>DB04841</b> | Flunarizine          | Approved                  | CACNA1G  |
| <b>DB06209</b> | Prasugrel            | Approved                  | P2RY12   |
| <b>DB06228</b> | Rivaroxaban          | Approved                  | F10      |
| <b>DB06605</b> | Apixaban             | Approved                  | F10      |
| <b>DB06693</b> | Mevastatin           | Approved                  | HMGCR    |
| <b>DB06695</b> | Dabigatran etexilate | Approved                  | F2       |
| <b>DB06779</b> | Dalteparin           | Approved                  | VEGFA    |
| <b>DB06779</b> | Dalteparin           | Approved                  | SERPINC1 |
| <b>DB06779</b> | Dalteparin           | Approved                  | TFPI     |

|                |            |                 |          |
|----------------|------------|-----------------|----------|
| <b>DB06779</b> | Dalteparin | Approved        | SELP     |
| <b>DB06822</b> | Tinzaparin | Approved        | SERPINC1 |
| <b>DB06822</b> | Tinzaparin | Approved        | ITGA4    |
| <b>DB06822</b> | Tinzaparin | Approved        | CXCL12   |
| <b>DB08813</b> | Nadroparin | Approved        | SERPINC1 |
| <b>DB08813</b> | Nadroparin | Approved        | FOS      |
| <b>DB08813</b> | Nadroparin | Approved        | SELP     |
| <b>DB08814</b> | Triflusal  | Approved        | NOS2     |
| <b>DB08814</b> | Triflusal  | Approved        | PTGS1    |
| <b>DB08814</b> | Triflusal  | Approved        | PDE10A   |
| <b>DB08814</b> | Triflusal  | Approved        | NFKB1    |
| <b>DB08816</b> | Ticagrelor | Approved        | P2RY12   |
| <b>DB08836</b> | Temocapril | Investigational | ACE      |

**Table S3. GO enrichment analysis-Biological process terms of AIS genes.** Here we showed the toppest 200 Biological process terms of AIS credible genes. The PV and CPV respectively mean P-value and Corrected p-value.

| <b>GO-ID</b>      | <b>Description</b>                             | <b>PV</b> | <b>CPV</b> |
|-------------------|------------------------------------------------|-----------|------------|
| <b>GO:0006950</b> | response to stress                             | 2.81E-60  | 1.13E-56   |
| <b>GO:0042221</b> | response to chemical stimulus                  | 6.37E-53  | 1.28E-49   |
| <b>GO:0043067</b> | regulation of programmed cell death            | 1.03E-47  | 1.37E-44   |
| <b>GO:0042981</b> | regulation of apoptosis                        | 1.93E-47  | 1.94E-44   |
| <b>GO:0010941</b> | regulation of cell death                       | 2.72E-47  | 2.19E-44   |
| <b>GO:0051239</b> | regulation of multicellular organismal process | 1.04E-45  | 6.94E-43   |
| <b>GO:0065008</b> | regulation of biological quality               | 1.74E-45  | 9.99E-43   |
| <b>GO:0050896</b> | response to stimulus                           | 8.44E-45  | 4.23E-42   |
| <b>GO:0009611</b> | response to wounding                           | 1.92E-41  | 8.55E-39   |
| <b>GO:0048518</b> | positive regulation of biological process      | 1.6E-39   | 6.44E-37   |

|                   |                                                         |          |          |
|-------------------|---------------------------------------------------------|----------|----------|
| <b>GO:0010033</b> | response to organic substance                           | 4.22E-37 | 1.54E-34 |
| <b>GO:0048522</b> | positive regulation of cellular process                 | 7.05E-35 | 2.36E-32 |
| <b>GO:0060548</b> | negative regulation of cell death                       | 3.97E-34 | 1.17E-31 |
| <b>GO:0065007</b> | biological regulation                                   | 4.07E-34 | 1.17E-31 |
| <b>GO:0048519</b> | negative regulation of biological process               | 6.32E-34 | 1.69E-31 |
| <b>GO:0043066</b> | negative regulation of apoptosis                        | 1.18E-32 | 2.96E-30 |
| <b>GO:0043069</b> | negative regulation of programmed cell death            | 2.99E-32 | 7.06E-30 |
| <b>GO:0042592</b> | homeostatic process                                     | 8.27E-30 | 1.84E-27 |
| <b>GO:0023052</b> | signaling                                               | 1.61E-29 | 3.41E-27 |
| <b>GO:0048731</b> | system development                                      | 1.89E-29 | 3.8E-27  |
| <b>GO:0048856</b> | anatomical structure development                        | 2.25E-29 | 4.3E-27  |
| <b>GO:0032501</b> | multicellular organismal process                        | 7.41E-29 | 1.35E-26 |
| <b>GO:0048523</b> | negative regulation of cellular process                 | 1.04E-28 | 1.81E-26 |
| <b>GO:0032502</b> | developmental process                                   | 9.9E-28  | 1.66E-25 |
| <b>GO:0051240</b> | positive regulation of multicellular organismal process | 2.83E-27 | 4.55E-25 |
| <b>GO:0044057</b> | regulation of system process                            | 4.71E-26 | 7.28E-24 |
| <b>GO:0050789</b> | regulation of biological process                        | 6.59E-26 | 9.79E-24 |
| <b>GO:0048583</b> | regulation of response to stimulus                      | 8.61E-26 | 1.23E-23 |
| <b>GO:0048878</b> | chemical homeostasis                                    | 1.43E-25 | 1.99E-23 |
| <b>GO:0032879</b> | regulation of localization                              | 1.61E-25 | 2.15E-23 |
| <b>GO:0007275</b> | multicellular organismal development                    | 1.67E-25 | 2.16E-23 |
| <b>GO:0010646</b> | regulation of cell communication                        | 3.69E-25 | 4.63E-23 |
| <b>GO:0009605</b> | response to external stimulus                           | 5.2E-25  | 6.32E-23 |
| <b>GO:0006916</b> | anti-apoptosis                                          | 6.21E-25 | 7.34E-23 |
| <b>GO:0051241</b> | negative regulation of multicellular organismal process | 6.49E-25 | 7.44E-23 |
| <b>GO:0032101</b> | regulation of response to external stimulus             | 7.72E-25 | 8.61E-23 |
| <b>GO:0042060</b> | wound healing                                           | 5.22E-24 | 5.66E-22 |
| <b>GO:0019725</b> | cellular homeostasis                                    | 1.54E-23 | 1.62E-21 |
| <b>GO:0065009</b> | regulation of molecular function                        | 2.01E-23 | 2.07E-21 |

|                   |                                                |          |          |
|-------------------|------------------------------------------------|----------|----------|
| <b>GO:0050794</b> | regulation of cellular process                 | 4.47E-23 | 4.49E-21 |
| <b>GO:0050793</b> | regulation of developmental process            | 8.38E-23 | 8.2E-21  |
| <b>GO:0009628</b> | response to abiotic stimulus                   | 3.79E-22 | 3.62E-20 |
| <b>GO:0007399</b> | nervous system development                     | 5.53E-22 | 5.16E-20 |
| <b>GO:0023060</b> | signal transmission                            | 8.03E-22 | 7.16E-20 |
| <b>GO:0023046</b> | signaling process                              | 8.03E-22 | 7.16E-20 |
| <b>GO:0051049</b> | regulation of transport                        | 1.17E-21 | 1.03E-19 |
| <b>GO:0043068</b> | positive regulation of programmed cell death   | 3.27E-21 | 2.79E-19 |
| <b>GO:0010942</b> | positive regulation of cell death              | 5.36E-21 | 4.48E-19 |
| <b>GO:0044093</b> | positive regulation of molecular function      | 7.23E-21 | 5.92E-19 |
| <b>GO:0043065</b> | positive regulation of apoptosis               | 1.07E-20 | 8.55E-19 |
| <b>GO:0023033</b> | signaling pathway                              | 1.62E-20 | 1.27E-18 |
| <b>GO:0007166</b> | cell surface receptor linked signaling pathway | 3.2E-20  | 2.47E-18 |
| <b>GO:0007610</b> | behavior                                       | 3.67E-20 | 2.78E-18 |
| <b>GO:0051716</b> | cellular response to stimulus                  | 1.34E-19 | 9.99E-18 |
| <b>GO:0050817</b> | coagulation                                    | 1.48E-19 | 1.06E-17 |
| <b>GO:0007596</b> | blood coagulation                              | 1.48E-19 | 1.06E-17 |
| <b>GO:0080134</b> | regulation of response to stress               | 1.99E-19 | 1.4E-17  |
| <b>GO:0050801</b> | ion homeostasis                                | 2.54E-19 | 1.76E-17 |
| <b>GO:0050878</b> | regulation of body fluid levels                | 2.6E-19  | 1.77E-17 |
| <b>GO:0050804</b> | regulation of synaptic transmission            | 2.7E-19  | 1.81E-17 |
| <b>GO:0006873</b> | cellular ion homeostasis                       | 2.85E-19 | 1.88E-17 |
| <b>GO:0051094</b> | positive regulation of developmental process   | 3.76E-19 | 2.42E-17 |
| <b>GO:0050790</b> | regulation of catalytic activity               | 3.8E-19  | 2.42E-17 |
| <b>GO:0048513</b> | organ development                              | 5.26E-19 | 3.27E-17 |
| <b>GO:0001666</b> | response to hypoxia                            | 5.38E-19 | 3.27E-17 |
| <b>GO:0031644</b> | regulation of neurological system process      | 5.38E-19 | 3.27E-17 |
| <b>GO:0051050</b> | positive regulation of transport               | 6.2E-19  | 3.68E-17 |
| <b>GO:0055082</b> | cellular chemical homeostasis                  | 6.23E-19 | 3.68E-17 |

|                   |                                             |          |          |
|-------------------|---------------------------------------------|----------|----------|
| <b>GO:0007599</b> | hemostasis                                  | 9.39E-19 | 5.46E-17 |
| <b>GO:0043085</b> | positive regulation of catalytic activity   | 1.54E-18 | 8.83E-17 |
| <b>GO:0009607</b> | response to biotic stimulus                 | 1.6E-18  | 9.07E-17 |
| <b>GO:0006979</b> | response to oxidative stress                | 2.48E-18 | 1.38E-16 |
| <b>GO:0051969</b> | regulation of transmission of nerve impulse | 3.46E-18 | 1.89E-16 |
| <b>GO:0030334</b> | regulation of cell migration                | 3.48E-18 | 1.89E-16 |
| <b>GO:0070482</b> | response to oxygen levels                   | 4.26E-18 | 2.28E-16 |
| <b>GO:0000302</b> | response to reactive oxygen species         | 1.01E-17 | 5.33E-16 |
| <b>GO:0007154</b> | cell communication                          | 3.15E-17 | 1.64E-15 |
| <b>GO:0040012</b> | regulation of locomotion                    | 3.92E-17 | 2.02E-15 |
| <b>GO:0009991</b> | response to extracellular stimulus          | 4.37E-17 | 2.22E-15 |
| <b>GO:0043523</b> | regulation of neuron apoptosis              | 5.12E-17 | 2.54E-15 |
| <b>GO:0042127</b> | regulation of cell proliferation            | 5.17E-17 | 2.54E-15 |
| <b>GO:0006952</b> | defense response                            | 5.19E-17 | 2.54E-15 |
| <b>GO:0070887</b> | cellular response to chemical stimulus      | 5.33E-17 | 2.58E-15 |
| <b>GO:0042493</b> | response to drug                            | 7.18E-17 | 3.43E-15 |
| <b>GO:0051789</b> | response to protein stimulus                | 8.31E-17 | 3.92E-15 |
| <b>GO:0048869</b> | cellular developmental process              | 1.23E-16 | 5.75E-15 |
| <b>GO:0051270</b> | regulation of cellular component movement   | 1.63E-16 | 7.54E-15 |
| <b>GO:0051246</b> | regulation of protein metabolic process     | 1.9E-16  | 8.66E-15 |
| <b>GO:0030154</b> | cell differentiation                        | 2.01E-16 | 9.08E-15 |
| <b>GO:0007268</b> | synaptic transmission                       | 2.27E-16 | 1.01E-14 |
| <b>GO:0045595</b> | regulation of cell differentiation          | 3.29E-16 | 1.45E-14 |
| <b>GO:0042391</b> | regulation of membrane potential            | 3.76E-16 | 1.64E-14 |
| <b>GO:0006954</b> | inflammatory response                       | 3.88E-16 | 1.67E-14 |
| <b>GO:0050818</b> | regulation of coagulation                   | 4.52E-16 | 1.93E-14 |
| <b>GO:0019226</b> | transmission of nerve impulse               | 4.57E-16 | 1.93E-14 |
| <b>GO:0009653</b> | anatomical structure morphogenesis          | 5.62E-16 | 2.35E-14 |
| <b>GO:0010035</b> | response to inorganic substance             | 7.83E-16 | 3.24E-14 |

|                   |                                                  |          |          |
|-------------------|--------------------------------------------------|----------|----------|
| <b>GO:0009719</b> | response to endogenous stimulus                  | 8.9E-16  | 3.65E-14 |
| <b>GO:0030193</b> | regulation of blood coagulation                  | 1.04E-15 | 4.2E-14  |
| <b>GO:0010647</b> | positive regulation of cell communication        | 1.07E-15 | 4.29E-14 |
| <b>GO:0031667</b> | response to nutrient levels                      | 1.66E-15 | 6.58E-14 |
| <b>GO:0048514</b> | blood vessel morphogenesis                       | 1.77E-15 | 6.95E-14 |
| <b>GO:0042542</b> | response to hydrogen peroxide                    | 1.84E-15 | 7.18E-14 |
| <b>GO:0032268</b> | regulation of cellular protein metabolic process | 1.87E-15 | 7.2E-14  |
| <b>GO:0003013</b> | circulatory system process                       | 2.84E-15 | 1.08E-13 |
| <b>GO:0008015</b> | blood circulation                                | 2.84E-15 | 1.08E-13 |
| <b>GO:0048699</b> | generation of neurons                            | 3.32E-15 | 1.24E-13 |
| <b>GO:0050727</b> | regulation of inflammatory response              | 4.18E-15 | 1.55E-13 |
| <b>GO:0001568</b> | blood vessel development                         | 8.26E-15 | 3.04E-13 |
| <b>GO:0061041</b> | regulation of wound healing                      | 8.74E-15 | 3.19E-13 |
| <b>GO:0022008</b> | neurogenesis                                     | 9.55E-15 | 3.45E-13 |
| <b>GO:0031099</b> | regeneration                                     | 1.73E-14 | 6.18E-13 |
| <b>GO:0007267</b> | cell-cell signaling                              | 1.84E-14 | 6.54E-13 |
| <b>GO:0001944</b> | vasculature development                          | 2.38E-14 | 8.38E-13 |
| <b>GO:0008219</b> | cell death                                       | 2.72E-14 | 9.5E-13  |
| <b>GO:0042325</b> | regulation of phosphorylation                    | 3.21E-14 | 1.11E-12 |
| <b>GO:0009266</b> | response to temperature stimulus                 | 3.65E-14 | 1.25E-12 |
| <b>GO:0007165</b> | signal transduction                              | 3.78E-14 | 1.29E-12 |
| <b>GO:0016265</b> | death                                            | 3.92E-14 | 1.32E-12 |
| <b>GO:0032496</b> | response to lipopolysaccharide                   | 3.95E-14 | 1.32E-12 |
| <b>GO:0002682</b> | regulation of immune system process              | 4.7E-14  | 1.56E-12 |
| <b>GO:0002237</b> | response to molecule of bacterial origin         | 5.73E-14 | 1.89E-12 |
| <b>GO:0051338</b> | regulation of transferase activity               | 5.95E-14 | 1.94E-12 |
| <b>GO:0009725</b> | response to hormone stimulus                     | 6.96E-14 | 2.25E-12 |
| <b>GO:0051174</b> | regulation of phosphorus metabolic process       | 7.11E-14 | 2.26E-12 |
| <b>GO:0019220</b> | regulation of phosphate metabolic process        | 7.11E-14 | 2.26E-12 |



|                   |                                                          |          |          |
|-------------------|----------------------------------------------------------|----------|----------|
| <b>GO:0014070</b> | response to organic cyclic substance                     | 7.72E-14 | 2.44E-12 |
| <b>GO:0051347</b> | positive regulation of transferase activity              | 1.96E-13 | 6.16E-12 |
| <b>GO:0043549</b> | regulation of kinase activity                            | 2.03E-13 | 6.31E-12 |
| <b>GO:0008217</b> | regulation of blood pressure                             | 2.48E-13 | 7.65E-12 |
| <b>GO:0033674</b> | positive regulation of kinase activity                   | 2.92E-13 | 8.95E-12 |
| <b>GO:0044092</b> | negative regulation of molecular function                | 3.21E-13 | 9.77E-12 |
| <b>GO:0051098</b> | regulation of binding                                    | 3.65E-13 | 1.1E-11  |
| <b>GO:0031325</b> | positive regulation of cellular metabolic process        | 3.69E-13 | 1.11E-11 |
| <b>GO:0009893</b> | positive regulation of metabolic process                 | 3.75E-13 | 1.12E-11 |
| <b>GO:0045860</b> | positive regulation of protein kinase activity           | 4.32E-13 | 1.27E-11 |
| <b>GO:0006915</b> | apoptosis                                                | 4.9E-13  | 1.44E-11 |
| <b>GO:0045859</b> | regulation of protein kinase activity                    | 7.6E-13  | 2.21E-11 |
| <b>GO:0007611</b> | learning or memory                                       | 9.69E-13 | 2.8E-11  |
| <b>GO:0030182</b> | neuron differentiation                                   | 1.02E-12 | 2.91E-11 |
| <b>GO:0012501</b> | programmed cell death                                    | 1.06E-12 | 3E-11    |
| <b>GO:0035466</b> | regulation of signaling pathway                          | 1.06E-12 | 3E-11    |
| <b>GO:0045429</b> | positive regulation of nitric oxide biosynthetic process | 1.5E-12  | 4.2E-11  |
| <b>GO:0002376</b> | immune system process                                    | 2.1E-12  | 5.85E-11 |
| <b>GO:0001817</b> | regulation of cytokine production                        | 2.23E-12 | 6.17E-11 |
| <b>GO:0048666</b> | neuron development                                       | 2.3E-12  | 6.33E-11 |
| <b>GO:0048545</b> | response to steroid hormone stimulus                     | 2.38E-12 | 6.51E-11 |
| <b>GO:0045428</b> | regulation of nitric oxide biosynthetic process          | 2.43E-12 | 6.6E-11  |
| <b>GO:0009892</b> | negative regulation of metabolic process                 | 2.55E-12 | 6.87E-11 |
| <b>GO:0048167</b> | regulation of synaptic plasticity                        | 2.67E-12 | 7.15E-11 |
| <b>GO:0009891</b> | positive regulation of biosynthetic process              | 2.71E-12 | 7.22E-11 |
| <b>GO:0050819</b> | negative regulation of coagulation                       | 2.89E-12 | 7.62E-11 |
| <b>GO:0030335</b> | positive regulation of cell migration                    | 3.45E-12 | 9.04E-11 |
| <b>GO:0090066</b> | regulation of anatomical structure size                  | 3.61E-12 | 9.42E-11 |
| <b>GO:0031328</b> | positive regulation of cellular biosynthetic process     | 3.82E-12 | 9.9E-11  |

|                   |                                                      |          |          |
|-------------------|------------------------------------------------------|----------|----------|
| <b>GO:0051046</b> | regulation of secretion                              | 3.92E-12 | 1.01E-10 |
| <b>GO:0045597</b> | positive regulation of cell differentiation          | 4.77E-12 | 1.22E-10 |
| <b>GO:0030194</b> | positive regulation of blood coagulation             | 6.8E-12  | 1.73E-10 |
| <b>GO:0051704</b> | multi-organism process                               | 8.86E-12 | 2.24E-10 |
| <b>GO:0051047</b> | positive regulation of secretion                     | 1.04E-11 | 2.6E-10  |
| <b>GO:0002685</b> | regulation of leukocyte migration                    | 1.05E-11 | 2.62E-10 |
| <b>GO:0022603</b> | regulation of anatomical structure morphogenesis     | 1.09E-11 | 2.71E-10 |
| <b>GO:0051899</b> | membrane depolarization                              | 1.15E-11 | 2.82E-10 |
| <b>GO:0032103</b> | positive regulation of response to external stimulus | 1.31E-11 | 3.21E-10 |
| <b>GO:0051272</b> | positive regulation of cellular component movement   | 1.76E-11 | 4.25E-10 |
| <b>GO:0040017</b> | positive regulation of locomotion                    | 1.76E-11 | 4.25E-10 |
| <b>GO:0048468</b> | cell development                                     | 1.87E-11 | 4.49E-10 |
| <b>GO:0030195</b> | negative regulation of blood coagulation             | 2.03E-11 | 4.86E-10 |
| <b>GO:0009617</b> | response to bacterium                                | 2.12E-11 | 5.03E-10 |
| <b>GO:0031175</b> | neuron projection development                        | 2.55E-11 | 6.02E-10 |
| <b>GO:0010627</b> | regulation of intracellular protein kinase cascade   | 2.63E-11 | 6.17E-10 |
| <b>GO:0006800</b> | oxygen and reactive oxygen species metabolic process | 3.2E-11  | 7.47E-10 |
| <b>GO:0006986</b> | response to unfolded protein                         | 4.24E-11 | 9.85E-10 |
| <b>GO:0002687</b> | positive regulation of leukocyte migration           | 4.78E-11 | 1.1E-09  |
| <b>GO:0051093</b> | negative regulation of developmental process         | 5.02E-11 | 1.15E-09 |
| <b>GO:0012502</b> | induction of programmed cell death                   | 5.05E-11 | 1.15E-09 |
| <b>GO:0009967</b> | positive regulation of signal transduction           | 5.14E-11 | 1.17E-09 |
| <b>GO:0055066</b> | di-, tri-valent inorganic cation homeostasis         | 6.99E-11 | 1.58E-09 |
| <b>GO:0055074</b> | calcium ion homeostasis                              | 7.11E-11 | 1.59E-09 |
| <b>GO:0023056</b> | positive regulation of signaling process             | 8.72E-11 | 1.95E-09 |
| <b>GO:0009966</b> | regulation of signal transduction                    | 9.06E-11 | 2.01E-09 |
| <b>GO:0055065</b> | metal ion homeostasis                                | 9.21E-11 | 2.03E-09 |
| <b>GO:0035468</b> | positive regulation of signaling pathway             | 1.04E-10 | 2.29E-09 |
| <b>GO:0045765</b> | regulation of angiogenesis                           | 1.05E-10 | 2.29E-09 |

|                   |                                                            |          |          |
|-------------------|------------------------------------------------------------|----------|----------|
| <b>GO:0031399</b> | regulation of protein modification process                 | 1.08E-10 | 2.34E-09 |
| <b>GO:0050820</b> | positive regulation of coagulation                         | 1.19E-10 | 2.56E-09 |
| <b>GO:0023051</b> | regulation of signaling process                            | 1.2E-10  | 2.59E-09 |
| <b>GO:0051173</b> | positive regulation of nitrogen compound metabolic process | 1.25E-10 | 2.68E-09 |
| <b>GO:0055080</b> | cation homeostasis                                         | 1.32E-10 | 2.8E-09  |
| <b>GO:0006874</b> | cellular calcium ion homeostasis                           | 1.36E-10 | 2.88E-09 |
| <b>GO:0042312</b> | regulation of vasodilation                                 | 1.43E-10 | 3.01E-09 |
| <b>GO:0051707</b> | response to other organism                                 | 1.57E-10 | 3.28E-09 |
| <b>GO:0006917</b> | induction of apoptosis                                     | 1.73E-10 | 3.61E-09 |
| <b>GO:0003008</b> | system process                                             | 1.87E-10 | 3.87E-09 |
| <b>GO:0033554</b> | cellular response to stress                                | 2.02E-10 | 4.15E-09 |
| <b>GO:0040008</b> | regulation of growth                                       | 2.04E-10 | 4.19E-09 |
| <b>GO:0060284</b> | regulation of cell development                             | 2.15E-10 | 4.38E-09 |
| <b>GO:0032583</b> | regulation of gene-specific transcription                  | 2.19E-10 | 4.44E-09 |
| <b>GO:0050729</b> | positive regulation of inflammatory response               | 2.25E-10 | 4.54E-09 |
| <b>GO:0060341</b> | regulation of cellular localization                        | 2.49E-10 | 5E-09    |

**Table S4. GO enrichment analysis-Molecular Function terms of AIS genes.**

| <b>GO-ID</b>      | <b>Description</b>                                 | <b>PV</b> | <b>CPV</b> |
|-------------------|----------------------------------------------------|-----------|------------|
| <b>GO:0005102</b> | receptor binding                                   | 7.81E-24  | 7.64E-21   |
| <b>GO:0005515</b> | protein binding                                    | 2.43E-22  | 1.19E-19   |
| <b>GO:0046983</b> | protein dimerization activity                      | 1.64E-20  | 5.35E-18   |
| <b>GO:0008066</b> | glutamate receptor activity                        | 7.21E-14  | 1.76E-11   |
| <b>GO:0042802</b> | identical protein binding                          | 2.40E-12  | 4.71E-10   |
| <b>GO:0019899</b> | enzyme binding                                     | 6.38E-12  | 1.04E-09   |
| <b>GO:0046982</b> | protein heterodimerization activity                | 5.04E-11  | 7.04E-09   |
| <b>GO:0005234</b> | extracellular-glutamate-gated ion channel activity | 1.19E-10  | 1.45E-08   |

|                   |                                                            |          |          |
|-------------------|------------------------------------------------------------|----------|----------|
| <b>GO:0042803</b> | protein homodimerization activity                          | 3.01E-10 | 3.28E-08 |
| <b>GO:0005231</b> | excitatory extracellular ligand-gated ion channel activity | 4.57E-10 | 4.48E-08 |
| <b>GO:0015267</b> | channel activity                                           | 5.83E-10 | 5.14E-08 |
| <b>GO:0022803</b> | passive transmembrane transporter activity                 | 6.30E-10 | 5.14E-08 |
| <b>GO:0004970</b> | ionotropic glutamate receptor activity                     | 9.02E-10 | 6.79E-08 |
| <b>GO:0008201</b> | heparin binding                                            | 2.58E-09 | 1.81E-07 |
| <b>GO:0005539</b> | glycosaminoglycan binding                                  | 3.37E-09 | 2.20E-07 |
| <b>GO:0022838</b> | substrate-specific channel activity                        | 6.79E-09 | 4.10E-07 |
| <b>GO:0016209</b> | antioxidant activity                                       | 7.13E-09 | 4.10E-07 |
| <b>GO:0020037</b> | heme binding                                               | 1.41E-08 | 7.64E-07 |
| <b>GO:0022891</b> | substrate-specific transmembrane transporter activity      | 2.08E-08 | 1.00E-06 |
| <b>GO:0030247</b> | polysaccharide binding                                     | 2.23E-08 | 1.00E-06 |
| <b>GO:0001871</b> | pattern binding                                            | 2.23E-08 | 1.00E-06 |
| <b>GO:0022892</b> | substrate-specific transporter activity                    | 2.25E-08 | 1.00E-06 |
| <b>GO:0015075</b> | ion transmembrane transporter activity                     | 2.97E-08 | 1.26E-06 |
| <b>GO:0005216</b> | ion channel activity                                       | 3.60E-08 | 1.47E-06 |
| <b>GO:0046906</b> | tetrapyrrole binding                                       | 4.25E-08 | 1.67E-06 |
| <b>GO:0022857</b> | transmembrane transporter activity                         | 4.74E-08 | 1.78E-06 |
| <b>GO:0008083</b> | growth factor activity                                     | 6.46E-08 | 2.34E-06 |
| <b>GO:0043498</b> | cell surface binding                                       | 1.47E-07 | 5.15E-06 |
| <b>GO:0005230</b> | extracellular ligand-gated ion channel activity            | 1.99E-07 | 6.57E-06 |
| <b>GO:0022836</b> | gated channel activity                                     | 2.01E-07 | 6.57E-06 |
| <b>GO:0005215</b> | transporter activity                                       | 2.27E-07 | 7.16E-06 |
| <b>GO:0008324</b> | cation transmembrane transporter activity                  | 4.17E-07 | 1.27E-05 |
| <b>GO:0015276</b> | ligand-gated ion channel activity                          | 4.93E-07 | 1.42E-05 |
| <b>GO:0022834</b> | ligand-gated channel activity                              | 4.93E-07 | 1.42E-05 |
| <b>GO:0032403</b> | protein complex binding                                    | 5.67E-07 | 1.59E-05 |
| <b>GO:0070325</b> | lipoprotein receptor binding                               | 6.69E-07 | 1.81E-05 |

|                   |                                                            |          |          |
|-------------------|------------------------------------------------------------|----------|----------|
| <b>GO:0005488</b> | binding                                                    | 6.86E-07 | 1.81E-05 |
| <b>GO:0016667</b> | oxidoreductase activity, acting on sulfur group of donors  | 1.12E-06 | 2.88E-05 |
| <b>GO:0005179</b> | hormone activity                                           | 1.61E-06 | 3.97E-05 |
| <b>GO:0005506</b> | iron ion binding                                           | 1.62E-06 | 3.97E-05 |
| <b>GO:0005261</b> | cation channel activity                                    | 3.72E-06 | 8.87E-05 |
| <b>GO:0002020</b> | protease binding                                           | 4.54E-06 | 1.06E-04 |
| <b>GO:0001664</b> | G-protein-coupled receptor binding                         | 7.45E-06 | 1.70E-04 |
| <b>GO:0004972</b> | N-methyl-D-aspartate selective glutamate receptor activity | 8.21E-06 | 1.83E-04 |
| <b>GO:0043028</b> | caspase regulator activity                                 | 1.05E-05 | 2.28E-04 |
| <b>GO:0004871</b> | signal transducer activity                                 | 1.11E-05 | 2.32E-04 |
| <b>GO:0060089</b> | molecular transducer activity                              | 1.11E-05 | 2.32E-04 |
| <b>GO:0005310</b> | dicarboxylic acid transmembrane transporter activity       | 1.28E-05 | 2.60E-04 |
| <b>GO:0017153</b> | sodium:dicarboxylate symporter activity                    | 1.31E-05 | 2.63E-04 |
| <b>GO:0004175</b> | endopeptidase activity                                     | 1.50E-05 | 2.93E-04 |
| <b>GO:0008289</b> | lipid binding                                              | 1.62E-05 | 3.12E-04 |
| <b>GO:0030246</b> | carbohydrate binding                                       | 2.28E-05 | 4.30E-04 |
| <b>GO:0015277</b> | kainate selective glutamate receptor activity              | 2.39E-05 | 4.34E-04 |
| <b>GO:0015368</b> | calcium:cation antiporter activity                         | 2.39E-05 | 4.34E-04 |
| <b>GO:0009055</b> | electron carrier activity                                  | 2.53E-05 | 4.50E-04 |
| <b>GO:0030234</b> | enzyme regulator activity                                  | 2.68E-05 | 4.69E-04 |
| <b>GO:0004857</b> | enzyme inhibitor activity                                  | 2.90E-05 | 4.98E-04 |
| <b>GO:0043027</b> | caspase inhibitor activity                                 | 3.89E-05 | 6.45E-04 |
| <b>GO:0050750</b> | low-density lipoprotein receptor binding                   | 3.89E-05 | 6.45E-04 |
| <b>GO:0016491</b> | oxidoreductase activity                                    | 4.06E-05 | 6.62E-04 |
| <b>GO:0005126</b> | cytokine receptor binding                                  | 4.53E-05 | 7.08E-04 |
| <b>GO:0004517</b> | nitric-oxide synthase activity                             | 4.70E-05 | 7.08E-04 |
| <b>GO:0015038</b> | glutathione disulfide oxidoreductase activity              | 4.70E-05 | 7.08E-04 |

|                   |                                                                      |          |          |
|-------------------|----------------------------------------------------------------------|----------|----------|
| <b>GO:0016527</b> | brain-specific angiogenesis inhibitor activity                       | 4.70E-05 | 7.08E-04 |
| <b>GO:0034617</b> | tetrahydrobiopterin binding                                          | 4.70E-05 | 7.08E-04 |
| <b>GO:0070011</b> | peptidase activity, acting on L-amino acid peptides                  | 5.20E-05 | 7.48E-04 |
| <b>GO:0035326</b> | enhancer binding                                                     | 5.20E-05 | 7.48E-04 |
| <b>GO:0003705</b> | RNA polymerase II transcription factor activity,<br>enhancer binding | 5.20E-05 | 7.48E-04 |
| <b>GO:0016595</b> | glutamate binding                                                    | 5.42E-05 | 7.64E-04 |
| <b>GO:0015036</b> | disulfide oxidoreductase activity                                    | 5.46E-05 | 7.64E-04 |
| <b>GO:0050660</b> | FAD binding                                                          | 5.81E-05 | 8.02E-04 |
| <b>GO:0001530</b> | lipopolysaccharide binding                                           | 6.13E-05 | 8.34E-04 |
| <b>GO:0019900</b> | kinase binding                                                       | 6.35E-05 | 8.52E-04 |
| <b>GO:0061134</b> | peptidase regulator activity                                         | 8.13E-05 | 1.08E-03 |
| <b>GO:0047485</b> | protein N-terminus binding                                           | 8.49E-05 | 1.11E-03 |
| <b>GO:0005509</b> | calcium ion binding                                                  | 9.01E-05 | 1.16E-03 |
| <b>GO:0004601</b> | peroxidase activity                                                  | 9.59E-05 | 1.20E-03 |
| <b>GO:0016684</b> | oxidoreductase activity, acting on peroxide as<br>acceptor           | 9.59E-05 | 1.20E-03 |
| <b>GO:0047498</b> | calcium-dependent phospholipase A2 activity                          | 1.05E-04 | 1.31E-03 |
| <b>GO:0008233</b> | peptidase activity                                                   | 1.07E-04 | 1.31E-03 |
| <b>GO:0015296</b> | anion:cation symporter activity                                      | 1.19E-04 | 1.44E-03 |
| <b>GO:0015035</b> | protein disulfide oxidoreductase activity                            | 1.35E-04 | 1.59E-03 |
| <b>GO:0043499</b> | eukaryotic cell surface binding                                      | 1.35E-04 | 1.59E-03 |
| <b>GO:0008238</b> | exopeptidase activity                                                | 1.71E-04 | 1.99E-03 |
| <b>GO:0015037</b> | peptide disulfide oxidoreductase activity                            | 1.83E-04 | 2.04E-03 |
| <b>GO:0043125</b> | ErbB-3 class receptor binding                                        | 1.83E-04 | 2.04E-03 |
| <b>GO:0005432</b> | calcium:sodium antiporter activity                                   | 1.83E-04 | 2.04E-03 |
| <b>GO:0034618</b> | arginine binding                                                     | 1.83E-04 | 2.04E-03 |
| <b>GO:0016597</b> | amino acid binding                                                   | 2.17E-04 | 2.38E-03 |
| <b>GO:0015491</b> | cation:cation antiporter activity                                    | 2.61E-04 | 2.83E-03 |

|                   |                                                      |          |          |
|-------------------|------------------------------------------------------|----------|----------|
| <b>GO:0004866</b> | endopeptidase inhibitor activity                     | 2.63E-04 | 2.83E-03 |
| <b>GO:0004197</b> | cysteine-type endopeptidase activity                 | 2.81E-04 | 2.99E-03 |
| <b>GO:0061135</b> | endopeptidase regulator activity                     | 2.84E-04 | 2.99E-03 |
| <b>GO:0005125</b> | cytokine activity                                    | 2.93E-04 | 3.05E-03 |
| <b>GO:0030971</b> | receptor tyrosine kinase binding                     | 2.98E-04 | 3.07E-03 |
| <b>GO:0016502</b> | nucleotide receptor activity                         | 3.11E-04 | 3.14E-03 |
| <b>GO:0001614</b> | purinergic nucleotide receptor activity              | 3.11E-04 | 3.14E-03 |
| <b>GO:0004869</b> | cysteine-type endopeptidase inhibitor activity       | 3.70E-04 | 3.69E-03 |
| <b>GO:0005178</b> | integrin binding                                     | 4.10E-04 | 4.06E-03 |
| <b>GO:0051400</b> | BH domain binding                                    | 4.45E-04 | 4.23E-03 |
| <b>GO:0001609</b> | adenosine receptor activity, G-protein coupled       | 4.45E-04 | 4.23E-03 |
| <b>GO:0001875</b> | lipopolysaccharide receptor activity                 | 4.45E-04 | 4.23E-03 |
| <b>GO:0051787</b> | misfolded protein binding                            | 4.45E-04 | 4.23E-03 |
| <b>GO:0005543</b> | phospholipid binding                                 | 4.53E-04 | 4.24E-03 |
| <b>GO:0005313</b> | L-glutamate transmembrane transporter activity       | 4.55E-04 | 4.24E-03 |
| <b>GO:0030414</b> | peptidase inhibitor activity                         | 5.02E-04 | 4.63E-03 |
| <b>GO:0015298</b> | solute:cation antiporter activity                    | 5.07E-04 | 4.64E-03 |
| <b>GO:0005057</b> | receptor signaling protein activity                  | 5.74E-04 | 5.21E-03 |
| <b>GO:0005516</b> | calmodulin binding                                   | 5.91E-04 | 5.31E-03 |
| <b>GO:0001948</b> | glycoprotein binding                                 | 6.00E-04 | 5.34E-03 |
| <b>GO:0019901</b> | protein kinase binding                               | 6.20E-04 | 5.47E-03 |
| <b>GO:0015172</b> | acidic amino acid transmembrane transporter activity | 6.63E-04 | 5.77E-03 |
| <b>GO:0005507</b> | copper ion binding                                   | 6.66E-04 | 5.77E-03 |
| <b>GO:0070851</b> | growth factor receptor binding                       | 7.25E-04 | 6.20E-03 |
| <b>GO:0043176</b> | amine binding                                        | 7.28E-04 | 6.20E-03 |
| <b>GO:0019207</b> | kinase regulator activity                            | 8.13E-04 | 6.86E-03 |
| <b>GO:0070513</b> | death domain binding                                 | 8.66E-04 | 7.19E-03 |
| <b>GO:0030151</b> | molybdenum ion binding                               | 8.66E-04 | 7.19E-03 |
| <b>GO:0050662</b> | coenzyme binding                                     | 8.94E-04 | 7.35E-03 |

|                   |                                                            |          |          |
|-------------------|------------------------------------------------------------|----------|----------|
| <b>GO:0031406</b> | carboxylic acid binding                                    | 9.56E-04 | 7.80E-03 |
| <b>GO:0008237</b> | metallopeptidase activity                                  | 1.01E-03 | 8.13E-03 |
| <b>GO:0004620</b> | phospholipase activity                                     | 1.15E-03 | 9.26E-03 |
| <b>GO:0005159</b> | insulin-like growth factor receptor binding                | 1.27E-03 | 9.68E-03 |
| <b>GO:0004392</b> | heme oxygenase (decyclizing) activity                      | 1.30E-03 | 9.68E-03 |
| <b>GO:0070492</b> | oligosaccharide binding                                    | 1.30E-03 | 9.68E-03 |
| <b>GO:0043546</b> | molybdopterin cofactor binding                             | 1.30E-03 | 9.68E-03 |
| <b>GO:0004909</b> | interleukin-1, Type I, activating receptor activity        | 1.30E-03 | 9.68E-03 |
| <b>GO:0031711</b> | bradykinin receptor binding                                | 1.30E-03 | 9.68E-03 |
| <b>GO:0005314</b> | high-affinity glutamate transmembrane transporter activity | 1.30E-03 | 9.68E-03 |
| <b>GO:0051434</b> | BH3 domain binding                                         | 1.30E-03 | 9.68E-03 |
| <b>GO:0001641</b> | group II metabotropic glutamate receptor activity          | 1.30E-03 | 9.68E-03 |
| <b>GO:0004051</b> | arachidonate 5-lipoxygenase activity                       | 1.30E-03 | 9.68E-03 |
| <b>GO:0042277</b> | peptide binding                                            | 1.34E-03 | 9.89E-03 |
| <b>GO:0022832</b> | voltage-gated channel activity                             | 1.41E-03 | 1.02E-02 |
| <b>GO:0005244</b> | voltage-gated ion channel activity                         | 1.41E-03 | 1.02E-02 |
| <b>GO:0015179</b> | L-amino acid transmembrane transporter activity            | 1.44E-03 | 1.03E-02 |
| <b>GO:0004931</b> | extracellular ATP-gated cation channel activity            | 1.47E-03 | 1.03E-02 |
| <b>GO:0050786</b> | RAGE receptor binding                                      | 1.47E-03 | 1.03E-02 |
| <b>GO:0035381</b> | ATP-gated ion channel activity                             | 1.47E-03 | 1.03E-02 |
| <b>GO:0051920</b> | peroxiredoxin activity                                     | 1.47E-03 | 1.03E-02 |
| <b>GO:0019838</b> | growth factor binding                                      | 1.56E-03 | 1.08E-02 |
| <b>GO:0050661</b> | NADP or NADPH binding                                      | 1.94E-03 | 1.34E-02 |
| <b>GO:0005343</b> | organic acid:sodium symporter activity                     | 2.12E-03 | 1.45E-02 |
| <b>GO:0005246</b> | calcium channel regulator activity                         | 2.17E-03 | 1.48E-02 |
| <b>GO:0043121</b> | neurotrophin binding                                       | 2.30E-03 | 1.55E-02 |
| <b>GO:0004623</b> | phospholipase A2 activity                                  | 2.53E-03 | 1.70E-02 |
| <b>GO:0016860</b> | intramolecular oxidoreductase activity                     | 2.57E-03 | 1.71E-02 |



|                   |                                                                                             |          |          |
|-------------------|---------------------------------------------------------------------------------------------|----------|----------|
| <b>GO:0010843</b> | promoter binding                                                                            | 2.60E-03 | 1.72E-02 |
| <b>GO:0022829</b> | wide pore channel activity                                                                  | 2.76E-03 | 1.81E-02 |
| <b>GO:0008144</b> | drug binding                                                                                | 3.04E-03 | 1.98E-02 |
| <b>GO:0004091</b> | carboxylesterase activity                                                                   | 3.06E-03 | 1.98E-02 |
| <b>GO:0004955</b> | prostaglandin receptor activity                                                             | 3.35E-03 | 2.13E-02 |
| <b>GO:0016668</b> | oxidoreductase activity, acting on sulfur group of donors, NAD or NADP as acceptor          | 3.35E-03 | 2.13E-02 |
| <b>GO:0017127</b> | cholesterol transporter activity                                                            | 3.35E-03 | 2.13E-02 |
| <b>GO:0044212</b> | DNA regulatory region binding                                                               | 3.41E-03 | 2.15E-02 |
| <b>GO:0015485</b> | cholesterol binding                                                                         | 3.45E-03 | 2.17E-02 |
| <b>GO:0008047</b> | enzyme activator activity                                                                   | 3.78E-03 | 2.18E-02 |
| <b>GO:0016298</b> | lipase activity                                                                             | 3.80E-03 | 2.18E-02 |
| <b>GO:0015272</b> | ATP-activated inward rectifier potassium channel activity                                   | 3.82E-03 | 2.18E-02 |
| <b>GO:0070653</b> | high-density lipoprotein receptor binding                                                   | 3.82E-03 | 2.18E-02 |
| <b>GO:0004351</b> | glutamate decarboxylase activity                                                            | 3.82E-03 | 2.18E-02 |
| <b>GO:0008242</b> | omega peptidase activity                                                                    | 3.82E-03 | 2.18E-02 |
| <b>GO:0004971</b> | alpha-amino-3-hydroxy-5-methyl-4-isoxazole propionate selective glutamate receptor activity | 3.82E-03 | 2.18E-02 |
| <b>GO:0033691</b> | sialic acid binding                                                                         | 3.82E-03 | 2.18E-02 |
| <b>GO:0004784</b> | superoxide dismutase activity                                                               | 3.82E-03 | 2.18E-02 |
| <b>GO:0060230</b> | lipoprotein lipase activator activity                                                       | 3.82E-03 | 2.18E-02 |
| <b>GO:0031708</b> | endothelin B receptor binding                                                               | 3.82E-03 | 2.18E-02 |
| <b>GO:0031705</b> | bombesin receptor binding                                                                   | 3.82E-03 | 2.18E-02 |
| <b>GO:0005148</b> | prolactin receptor binding                                                                  | 3.82E-03 | 2.18E-02 |
| <b>GO:0016721</b> | oxidoreductase activity, acting on superoxide radicals as acceptor                          | 3.82E-03 | 2.18E-02 |
| <b>GO:0004063</b> | aryldialkylphosphatase activity                                                             | 3.82E-03 | 2.18E-02 |

|                   |                                                                                                       |          |          |
|-------------------|-------------------------------------------------------------------------------------------------------|----------|----------|
| <b>GO:0016705</b> | oxidoreductase activity, acting on paired donors, with incorporation or reduction of molecular oxygen | 3.84E-03 | 2.18E-02 |
| <b>GO:0019904</b> | protein domain specific binding                                                                       | 3.90E-03 | 2.21E-02 |
| <b>GO:0019887</b> | protein kinase regulator activity                                                                     | 4.14E-03 | 2.33E-02 |
| <b>GO:0004709</b> | MAP kinase kinase kinase activity                                                                     | 4.25E-03 | 2.36E-02 |
| <b>GO:0001540</b> | beta-amyloid binding                                                                                  | 4.25E-03 | 2.36E-02 |
| <b>GO:0004872</b> | receptor activity                                                                                     | 4.37E-03 | 2.42E-02 |
| <b>GO:0004954</b> | prostanoid receptor activity                                                                          | 4.66E-03 | 2.54E-02 |
| <b>GO:0004953</b> | icosanoid receptor activity                                                                           | 4.66E-03 | 2.54E-02 |
| <b>GO:0016594</b> | glycine binding                                                                                       | 4.66E-03 | 2.54E-02 |
| <b>GO:0005262</b> | calcium channel activity                                                                              | 4.73E-03 | 2.56E-02 |
| <b>GO:0048037</b> | cofactor binding                                                                                      | 4.95E-03 | 2.66E-02 |
| <b>GO:0004702</b> | receptor signaling protein serine/threonine kinase activity                                           | 5.20E-03 | 2.78E-02 |
| <b>GO:0004888</b> | transmembrane receptor activity                                                                       | 5.28E-03 | 2.81E-02 |
| <b>GO:0004177</b> | aminopeptidase activity                                                                               | 5.44E-03 | 2.86E-02 |
| <b>GO:0048306</b> | calcium-dependent protein binding                                                                     | 5.44E-03 | 2.86E-02 |
| <b>GO:0015248</b> | sterol transporter activity                                                                           | 6.24E-03 | 3.23E-02 |
| <b>GO:0035035</b> | histone acetyltransferase binding                                                                     | 6.24E-03 | 3.23E-02 |
| <b>GO:0005243</b> | gap junction channel activity                                                                         | 6.24E-03 | 3.23E-02 |
| <b>GO:0033130</b> | acetylcholine receptor binding                                                                        | 7.46E-03 | 3.67E-02 |
| <b>GO:0050544</b> | arachidonic acid binding                                                                              | 7.46E-03 | 3.67E-02 |
| <b>GO:0004157</b> | dihydropyrimidinase activity                                                                          | 7.46E-03 | 3.67E-02 |
| <b>GO:0050321</b> | tau-protein kinase activity                                                                           | 7.46E-03 | 3.67E-02 |
| <b>GO:0004945</b> | angiotensin type II receptor activity                                                                 | 7.46E-03 | 3.67E-02 |
| <b>GO:0004974</b> | leukotriene receptor activity                                                                         | 7.46E-03 | 3.67E-02 |
| <b>GO:0051637</b> | Gram-positive bacterial cell surface binding                                                          | 7.46E-03 | 3.67E-02 |
| <b>GO:0001595</b> | angiotensin receptor activity                                                                         | 7.46E-03 | 3.67E-02 |
| <b>GO:0004064</b> | arylesterase activity                                                                                 | 7.46E-03 | 3.67E-02 |

|                   |                                                     |          |          |
|-------------------|-----------------------------------------------------|----------|----------|
| <b>GO:0004067</b> | asparaginase activity                               | 7.46E-03 | 3.67E-02 |
| <b>GO:0010181</b> | FMN binding                                         | 8.10E-03 | 3.94E-02 |
| <b>GO:0015297</b> | antiporter activity                                 | 8.12E-03 | 3.94E-02 |
| <b>GO:0003824</b> | catalytic activity                                  | 8.12E-03 | 3.94E-02 |
| <b>GO:0008134</b> | transcription factor binding                        | 8.50E-03 | 4.10E-02 |
| <b>GO:0030545</b> | receptor regulator activity                         | 8.66E-03 | 4.15E-02 |
| <b>GO:0005496</b> | steroid binding                                     | 9.58E-03 | 4.57E-02 |
| <b>GO:0015300</b> | solute:solute antiporter activity                   | 9.85E-03 | 4.66E-02 |
| <b>GO:0015370</b> | solute:sodium symporter activity                    | 9.85E-03 | 4.66E-02 |
| <b>GO:0005520</b> | insulin-like growth factor binding                  | 1.01E-02 | 4.71E-02 |
| <b>GO:0016504</b> | peptidase activator activity                        | 1.01E-02 | 4.71E-02 |
| <b>GO:0016564</b> | transcription repressor activity                    | 1.01E-02 | 4.71E-02 |
| <b>GO:0070491</b> | transcription repressor binding                     | 1.02E-02 | 4.71E-02 |
| <b>GO:0004622</b> | lysophospholipase activity                          | 1.02E-02 | 4.71E-02 |
| <b>GO:0005344</b> | oxygen transporter activity                         | 1.02E-02 | 4.71E-02 |
| <b>GO:0004879</b> | ligand-dependent nuclear receptor activity          | 1.08E-02 | 4.94E-02 |
| <b>GO:0015291</b> | secondary active transmembrane transporter activity | 1.10E-02 | 5.00E-02 |

**Table S5. GO enrichment analysis-Cellular component terms of AIS genes.**

| <b>GO-ID</b>      | <b>Description</b>           | <b>PV</b> | <b>CPV</b> |
|-------------------|------------------------------|-----------|------------|
| <b>GO:0005615</b> | extracellular space          | 2.94E-26  | 1.34E-23   |
| <b>GO:0044421</b> | extracellular region part    | 4.47E-25  | 1.02E-22   |
| <b>GO:0000267</b> | cell fraction                | 5.36E-22  | 8.15E-20   |
| <b>GO:0044459</b> | plasma membrane part         | 2.44E-20  | 2.79E-18   |
| <b>GO:0043005</b> | neuron projection            | 7.28E-19  | 6.64E-17   |
| <b>GO:0005576</b> | extracellular region         | 1.07E-17  | 8.15E-16   |
| <b>GO:0005626</b> | insoluble fraction           | 2.08E-17  | 1.36E-15   |
| <b>GO:0005887</b> | integral to plasma membrane  | 9.04E-17  | 5.11E-15   |
| <b>GO:0031226</b> | intrinsic to plasma membrane | 1.01E-16  | 5.11E-15   |

|                   |                                       |          |          |
|-------------------|---------------------------------------|----------|----------|
| <b>GO:0005886</b> | plasma membrane                       | 2.27E-16 | 1.03E-14 |
| <b>GO:0009986</b> | cell surface                          | 2.88E-16 | 1.19E-14 |
| <b>GO:0005624</b> | membrane fraction                     | 9.97E-16 | 3.79E-14 |
| <b>GO:0042995</b> | cell projection                       | 9.85E-14 | 3.45E-12 |
| <b>GO:0030425</b> | dendrite                              | 2.66E-13 | 8.65E-12 |
| <b>GO:0005737</b> | cytoplasm                             | 4.76E-13 | 1.45E-11 |
| <b>GO:0045202</b> | synapse                               | 1.40E-12 | 4.00E-11 |
| <b>GO:0014069</b> | postsynaptic density                  | 2.37E-12 | 6.36E-11 |
| <b>GO:0044444</b> | cytoplasmic part                      | 3.32E-12 | 8.41E-11 |
| <b>GO:0031982</b> | vesicle                               | 3.91E-11 | 9.39E-10 |
| <b>GO:0044297</b> | cell body                             | 4.75E-11 | 1.01E-09 |
| <b>GO:0043025</b> | neuronal cell body                    | 4.75E-11 | 1.01E-09 |
| <b>GO:0044456</b> | synapse part                          | 4.89E-11 | 1.01E-09 |
| <b>GO:0031410</b> | cytoplasmic vesicle                   | 6.09E-11 | 1.21E-09 |
| <b>GO:0044463</b> | cell projection part                  | 1.04E-10 | 1.98E-09 |
| <b>GO:0031988</b> | membrane-bounded vesicle              | 1.27E-09 | 2.31E-08 |
| <b>GO:0008328</b> | ionotropic glutamate receptor complex | 2.00E-09 | 3.48E-08 |
| <b>GO:0030424</b> | axon                                  | 2.06E-09 | 3.48E-08 |
| <b>GO:0016023</b> | cytoplasmic membrane-bounded vesicle  | 3.61E-09 | 5.87E-08 |
| <b>GO:0045121</b> | membrane raft                         | 6.60E-09 | 1.04E-07 |
| <b>GO:0042734</b> | presynaptic membrane                  | 9.67E-09 | 1.47E-07 |
| <b>GO:0044309</b> | neuron spine                          | 2.38E-08 | 3.39E-07 |
| <b>GO:0043197</b> | dendritic spine                       | 2.38E-08 | 3.39E-07 |
| <b>GO:0031975</b> | envelope                              | 3.58E-08 | 4.95E-07 |
| <b>GO:0009897</b> | external side of plasma membrane      | 4.39E-08 | 5.88E-07 |
| <b>GO:0005625</b> | soluble fraction                      | 6.03E-08 | 7.85E-07 |
| <b>GO:0005829</b> | cytosol                               | 7.51E-08 | 9.51E-07 |
| <b>GO:0030141</b> | stored secretory granule              | 4.24E-07 | 5.23E-06 |
| <b>GO:0045211</b> | postsynaptic membrane                 | 7.39E-07 | 8.87E-06 |

|                   |                                                           |          |          |
|-------------------|-----------------------------------------------------------|----------|----------|
| <b>GO:0032994</b> | protein-lipid complex                                     | 1.49E-06 | 1.67E-05 |
| <b>GO:0034358</b> | plasma lipoprotein particle                               | 1.49E-06 | 1.67E-05 |
| <b>GO:0030426</b> | growth cone                                               | 1.50E-06 | 1.67E-05 |
| <b>GO:0031967</b> | organelle envelope                                        | 1.72E-06 | 1.87E-05 |
| <b>GO:0030427</b> | site of polarized growth                                  | 1.78E-06 | 1.89E-05 |
| <b>GO:0017146</b> | N-methyl-D-aspartate selective glutamate receptor complex | 2.38E-06 | 2.47E-05 |
| <b>GO:0034385</b> | triglyceride-rich lipoprotein particle                    | 2.80E-06 | 2.78E-05 |
| <b>GO:0034361</b> | very-low-density lipoprotein particle                     | 2.80E-06 | 2.78E-05 |
| <b>GO:0031983</b> | vesicle lumen                                             | 4.08E-06 | 3.95E-05 |
| <b>GO:0005901</b> | caveola                                                   | 4.15E-06 | 3.95E-05 |
| <b>GO:0043235</b> | receptor complex                                          | 4.53E-06 | 4.22E-05 |
| <b>GO:0033267</b> | axon part                                                 | 6.34E-06 | 5.78E-05 |
| <b>GO:0016020</b> | membrane                                                  | 7.18E-06 | 6.42E-05 |
| <b>GO:0031091</b> | platelet alpha granule                                    | 7.40E-06 | 6.49E-05 |
| <b>GO:0042597</b> | periplasmic space                                         | 1.01E-05 | 8.55E-05 |
| <b>GO:0030288</b> | outer membrane-bounded periplasmic space                  | 1.01E-05 | 8.55E-05 |
| <b>GO:0034364</b> | high-density lipoprotein particle                         | 1.11E-05 | 9.21E-05 |
| <b>GO:0019717</b> | synaptosome                                               | 1.46E-05 | 1.19E-04 |
| <b>GO:0005739</b> | mitochondrion                                             | 1.55E-05 | 1.24E-04 |
| <b>GO:0031012</b> | extracellular matrix                                      | 1.86E-05 | 1.45E-04 |
| <b>GO:0031093</b> | platelet alpha granule lumen                              | 1.87E-05 | 1.45E-04 |
| <b>GO:0005740</b> | mitochondrial envelope                                    | 1.94E-05 | 1.48E-04 |
| <b>GO:0043195</b> | terminal button                                           | 1.99E-05 | 1.49E-04 |
| <b>GO:0060205</b> | cytoplasmic membrane-bounded vesicle lumen                | 2.34E-05 | 1.72E-04 |
| <b>GO:0030054</b> | cell junction                                             | 2.38E-05 | 1.72E-04 |
| <b>GO:0042627</b> | chylomicron                                               | 3.01E-05 | 2.14E-04 |
| <b>GO:0030313</b> | cell envelope                                             | 4.75E-05 | 3.28E-04 |
| <b>GO:0044462</b> | external encapsulating structure part                     | 4.75E-05 | 3.28E-04 |

|                   |                                                                                                      |          |          |
|-------------------|------------------------------------------------------------------------------------------------------|----------|----------|
| <b>GO:0030312</b> | external encapsulating structure                                                                     | 7.18E-05 | 4.88E-04 |
| <b>GO:0034366</b> | spherical high-density lipoprotein particle                                                          | 8.55E-05 | 5.73E-04 |
| <b>GO:0034363</b> | intermediate-density lipoprotein particle                                                            | 1.56E-04 | 1.03E-03 |
| <b>GO:0043679</b> | axon terminus                                                                                        | 2.67E-04 | 1.72E-03 |
| <b>GO:0044306</b> | neuron projection terminus                                                                           | 2.67E-04 | 1.72E-03 |
| <b>GO:0043198</b> | dendritic shaft                                                                                      | 2.74E-04 | 1.74E-03 |
| <b>GO:0042383</b> | sarcolemma                                                                                           | 3.18E-04 | 1.99E-03 |
| <b>GO:0031970</b> | organelle envelope lumen                                                                             | 3.72E-04 | 2.29E-03 |
| <b>GO:0042598</b> | vesicular fraction                                                                                   | 3.99E-04 | 2.43E-03 |
| <b>GO:0044433</b> | cytoplasmic vesicle part                                                                             | 4.21E-04 | 2.52E-03 |
| <b>GO:0031966</b> | mitochondrial membrane                                                                               | 4.88E-04 | 2.89E-03 |
| <b>GO:0005578</b> | proteinaceous extracellular matrix                                                                   | 5.10E-04 | 2.98E-03 |
| <b>GO:0048786</b> | presynaptic active zone                                                                              | 7.40E-04 | 4.27E-03 |
| <b>GO:0048471</b> | perinuclear region of cytoplasm                                                                      | 7.86E-04 | 4.48E-03 |
| <b>GO:0005635</b> | nuclear envelope                                                                                     | 9.39E-04 | 5.29E-03 |
| <b>GO:0044304</b> | main axon                                                                                            | 1.15E-03 | 6.36E-03 |
| <b>GO:0044429</b> | mitochondrial part                                                                                   | 1.16E-03 | 6.36E-03 |
| <b>GO:0032281</b> | alpha-amino-3-hydroxy-5-methyl-4-<br>isoxazolepropionic acid selective glutamate receptor<br>complex | 1.17E-03 | 6.36E-03 |
| <b>GO:0005788</b> | endoplasmic reticulum lumen                                                                          | 1.36E-03 | 7.28E-03 |
| <b>GO:0005792</b> | microsome                                                                                            | 1.83E-03 | 9.72E-03 |
| <b>GO:0019867</b> | outer membrane                                                                                       | 1.97E-03 | 1.03E-02 |
| <b>GO:0005921</b> | gap junction                                                                                         | 3.25E-03 | 1.68E-02 |
| <b>GO:0032059</b> | bleb                                                                                                 | 3.43E-03 | 1.74E-02 |
| <b>GO:0008282</b> | ATP-sensitive potassium channel complex                                                              | 3.43E-03 | 1.74E-02 |
| <b>GO:0005741</b> | mitochondrial outer membrane                                                                         | 3.66E-03 | 1.84E-02 |
| <b>GO:0032279</b> | asymmetric synapse                                                                                   | 4.01E-03 | 1.99E-02 |
| <b>GO:0031968</b> | organelle outer membrane                                                                             | 4.49E-03 | 2.20E-02 |

|                   |                                                    |          |          |
|-------------------|----------------------------------------------------|----------|----------|
| <b>GO:0045177</b> | apical part of cell                                | 5.20E-03 | 2.52E-02 |
| <b>GO:0043204</b> | perikaryon                                         | 5.67E-03 | 2.69E-02 |
| <b>GO:0005758</b> | mitochondrial intermembrane space                  | 5.67E-03 | 2.69E-02 |
| <b>GO:0030666</b> | endocytic vesicle membrane                         | 6.43E-03 | 3.02E-02 |
| <b>GO:0005850</b> | eukaryotic translation initiation factor 2 complex | 6.71E-03 | 3.12E-02 |
| <b>GO:0034362</b> | low-density lipoprotein particle                   | 6.98E-03 | 3.22E-02 |
| <b>GO:0031974</b> | membrane-enclosed lumen                            | 7.93E-03 | 3.62E-02 |
| <b>GO:0008021</b> | synaptic vesicle                                   | 8.03E-03 | 3.63E-02 |
| <b>GO:0031594</b> | neuromuscular junction                             | 8.39E-03 | 3.75E-02 |
| <b>GO:0019866</b> | organelle inner membrane                           | 9.45E-03 | 4.19E-02 |
| <b>GO:0005783</b> | endoplasmic reticulum                              | 1.02E-02 | 4.48E-02 |
| <b>GO:0033268</b> | node of Ranvier                                    | 1.09E-02 | 4.66E-02 |
| <b>GO:0031088</b> | platelet dense granule membrane                    | 1.09E-02 | 4.66E-02 |
| <b>GO:0030877</b> | beta-catenin destruction complex                   | 1.09E-02 | 4.66E-02 |

**Table S6. Reactome Pathway enrichment analysis of AIS genes.**

| <b>Pathway</b>                                                | <b>Number of genes</b> | <b>PV</b> | <b>CPV</b> |
|---------------------------------------------------------------|------------------------|-----------|------------|
| Formation of Fibrin Clot (Clotting Cascade)                   | 16                     | 2.98E-08  | 3.25E-06   |
| Common Pathway of Fibrin Clot Formation                       | 11                     | 9.48E-07  | 5.89E-05   |
| Intrinsic Pathway for Apoptosis                               | 13                     | 3.05E-06  | 0.00016    |
| Neuronal System                                               | 39                     | 3.27E-06  | 0.000168   |
| Unblocking of NMDA receptor, glutamate binding and activation | 9                      | 6.56E-06  | 0.000294   |
| Hemostasis                                                    | 59                     | 6.99E-06  | 0.00031    |
| Platelet activation, signaling and aggregation                | 31                     | 3.15E-05  | 0.001092   |
| Apoptotic factor-mediated response                            | 6                      | 3.58E-05  | 0.001221   |
| Response to elevated platelet cytosolic Ca <sup>2+</sup>      | 17                     | 4.04E-05  | 0.001322   |

|                                                                              |    |          |          |
|------------------------------------------------------------------------------|----|----------|----------|
| MyD88:Mal cascade initiated on plasma membrane                               | 18 | 4.06E-05 | 0.001322 |
| Toll Like Receptor TLR6:TLR2 Cascade                                         | 18 | 4.06E-05 | 0.001322 |
| Toll Like Receptor 2 (TLR2) Cascade                                          | 18 | 5.84E-05 | 0.001759 |
| Toll Like Receptor TLR1:TLR2 Cascade                                         | 18 | 5.84E-05 | 0.001759 |
| Cellular responses to stress                                                 | 34 | 5.91E-05 | 0.001767 |
| Platelet degranulation                                                       | 16 | 6.68E-05 | 0.001955 |
| Detoxification of Reactive Oxygen Species                                    | 9  | 7.35E-05 | 0.002092 |
| MyD88-independent cascade                                                    | 18 | 8.26E-05 | 0.002294 |
| Toll Like Receptor 3 (TLR3) Cascade                                          | 18 | 8.26E-05 | 0.002294 |
| TRIF-mediated TLR3/TLR4 signaling                                            | 18 | 8.26E-05 | 0.002294 |
| Regulation of HSF1-mediated heat shock response                              | 8  | 0.000103 | 0.002634 |
| NGF-independant TRKA activation                                              | 5  | 0.000105 | 0.002669 |
| Activated TLR4 signalling                                                    | 19 | 0.00012  | 0.003003 |
| MyD88 cascade initiated on plasma membrane                                   | 16 | 0.000125 | 0.003087 |
| Toll Like Receptor 10 (TLR10) Cascade                                        | 16 | 0.000125 | 0.003087 |
| Toll Like Receptor 5 (TLR5) Cascade                                          | 16 | 0.000125 | 0.003087 |
| TRAF6 mediated induction of NFkB and MAP kinases upon TLR7/8 or 9 activation | 16 | 0.000141 | 0.003407 |
| Toll Like Receptor 4 (TLR4) Cascade                                          | 20 | 0.000147 | 0.003527 |
| Transmission across Chemical Synapses                                        | 27 | 0.00016  | 0.003743 |
| MyD88 dependent cascade initiated on endosome                                | 16 | 0.000179 | 0.004105 |
| Toll Like Receptor 7/8 (TLR7/8) Cascade                                      | 16 | 0.000179 | 0.004105 |
| Activation of TRKA receptors                                                 | 5  | 0.000184 | 0.004163 |
| Pre-NOTCH Processing in the Endoplasmic Reticulum                            | 5  | 0.000184 | 0.004163 |
| Signaling by NOTCH                                                           | 18 | 0.000216 | 0.004696 |
| CREB phosphorylation through the activation of CaMKII                        | 7  | 0.000243 | 0.005158 |
| Toll Like Receptor 9 (TLR9) Cascade                                          | 16 | 0.000251 | 0.005258 |
| Toll-Like Receptors Cascades                                                 | 21 | 0.000295 | 0.006067 |
| Interleukin-1 processing                                                     | 5  | 0.0003   | 0.006168 |



|                                                                                                                             |    |          |          |
|-----------------------------------------------------------------------------------------------------------------------------|----|----------|----------|
| Tandem pore domain potassium channels                                                                                       | 6  | 0.000304 | 0.006225 |
| Gastrin-CREB signalling pathway via PKC and MAPK                                                                            | 27 | 0.000371 | 0.007226 |
| DEx/H-box helicases activate type I IFN and inflammatory cytokines production                                               | 6  | 0.000423 | 0.008153 |
| Activation of NMDA receptor upon glutamate binding and postsynaptic events                                                  | 10 | 0.000434 | 0.008321 |
| Arachidonic acid metabolism                                                                                                 | 11 | 0.000486 | 0.009126 |
| Extrinsic Pathway of Fibrin Clot Formation                                                                                  | 8  | 0.000548 | 0.010008 |
| Regulation of Insulin-like Growth Factor (IGF) transport and uptake by Insulin-like Growth Factor Binding Proteins (IGFBPs) | 7  | 0.000683 | 0.011933 |
| Sodium/Calcium exchangers                                                                                                   | 5  | 0.000691 | 0.012048 |
| Eicosanoid ligand-binding receptors                                                                                         | 6  | 0.000769 | 0.012773 |
| Signalling by NGF                                                                                                           | 31 | 0.000902 | 0.014501 |
| Activation of caspases through apoptosome-mediated cleavage                                                                 | 4  | 0.000955 | 0.015104 |
| Cytochrome c-mediated apoptotic response                                                                                    | 4  | 0.000955 | 0.015104 |
| SMAC binds to IAPs                                                                                                          | 4  | 0.000955 | 0.015104 |
| SMAC-mediated apoptotic response                                                                                            | 4  | 0.000955 | 0.015104 |
| SMAC-mediated dissociation of IAP:caspase complexes                                                                         | 4  | 0.000955 | 0.015104 |
| Cellular response to heat stress                                                                                            | 9  | 0.000994 | 0.015501 |
| CRMPs in Sema3A signaling                                                                                                   | 6  | 0.001008 | 0.015651 |
| Inflammasomes                                                                                                               | 6  | 0.0013   | 0.018792 |
| G alpha (q) signalling events                                                                                               | 23 | 0.001363 | 0.019502 |
| Signaling by PDGF                                                                                                           | 22 | 0.001411 | 0.020048 |
| NOTCH2 intracellular domain regulates transcription                                                                         | 5  | 0.001858 | 0.024376 |
| Programmed Cell Death                                                                                                       | 20 | 0.001955 | 0.025355 |
| NGF signalling via TRKA from the plasma membrane                                                                            | 23 | 0.001979 | 0.025476 |
| Ras activation upon Ca <sup>2+</sup> influx through NMDA receptor                                                           | 6  | 0.002073 | 0.026325 |

|                                                                                                          |    |          |          |
|----------------------------------------------------------------------------------------------------------|----|----------|----------|
| Scavenging by Class A Receptors                                                                          | 6  | 0.002073 | 0.026325 |
| Nucleotide-binding domain, leucine rich repeat containing receptor (NLR) signaling pathways              | 10 | 0.002095 | 0.026533 |
| Transport of inorganic cations/anions and amino acids/oligopeptides                                      | 14 | 0.002438 | 0.029629 |
| Advanced glycosylation endproduct receptor signaling                                                     | 5  | 0.002456 | 0.029672 |
| Chylomicron-mediated lipid transport                                                                     | 5  | 0.002456 | 0.029672 |
| Dissolution of Fibrin Clot                                                                               | 5  | 0.002456 | 0.029672 |
| Notch-HLH transcription pathway                                                                          | 5  | 0.002456 | 0.029672 |
| PERK regulates gene expression                                                                           | 7  | 0.002757 | 0.032561 |
| RIP-mediated NFkB activation via ZBP1                                                                    | 6  | 0.003151 | 0.035608 |
| Attenuation phase                                                                                        | 5  | 0.003182 | 0.035823 |
| Synthesis of Prostaglandins (PG) and Thromboxanes (TX)                                                   | 5  | 0.003182 | 0.035823 |
| CREB phosphorylation through the activation of Ras                                                       | 7  | 0.003261 | 0.036556 |
| Pre-NOTCH Transcription and Translation                                                                  | 7  | 0.003261 | 0.036556 |
| Transport of gamma-carboxylated protein precursors from the endoplasmic reticulum to the Golgi apparatus | 4  | 0.00328  | 0.036732 |
| Apoptosis                                                                                                | 18 | 0.003323 | 0.036973 |
| HSF1-dependent transactivation                                                                           | 6  | 0.003824 | 0.040854 |
| Intrinsic Pathway of Fibrin Clot Formation                                                               | 6  | 0.003824 | 0.040854 |
| Cell surface interactions at the vascular wall                                                           | 14 | 0.004373 | 0.044892 |
| ATF6-alpha activates chaperone genes                                                                     | 4  | 0.004531 | 0.046103 |
| Gamma-carboxylation of protein precursors                                                                | 4  | 0.004531 | 0.046103 |
| Regulation of gene expression by Hypoxia-inducible Factor                                                | 4  | 0.004531 | 0.046103 |
| Removal of aminoterminal propeptides from gamma-carboxylated proteins                                    | 4  | 0.004531 | 0.046103 |
| MAP kinase activation in TLR cascade                                                                     | 10 | 0.004664 | 0.047314 |

**Table S7. The degrees of AIS existing drug targets.** There are totally 161 targets in which 152 are included in the String9.1 PPI network. And more than 45% have degrees larger than 50.

| AIS drug targes | Degree | AIS drug targes | Degree |
|-----------------|--------|-----------------|--------|
| VEGFA           | 345    | CACNB3          | 45     |
| ESR1            | 328    | CACNA2D1        | 44     |
| JUN             | 305    | PLAT            | 44     |
| FOS             | 296    | CACNB2          | 44     |
| CALM1           | 271    | CACNA1H         | 43     |
| PTGS2           | 209    | HMGCR           | 43     |
| PPARG           | 170    | PDE5A           | 41     |
| NFKB1           | 170    | CACNA1I         | 40     |
| CHRM2           | 169    | ACE             | 40     |
| HDAC2           | 165    | LRP2            | 40     |
| CHRM4           | 164    | DPP4            | 38     |
| OPRM1           | 163    | F10             | 30     |
| ITGB3           | 161    | MTR             | 29     |
| AR              | 158    | MUT             | 27     |
| AGTR1           | 150    | CA2             | 26     |
| CHRM3           | 149    | SLC9A1          | 25     |
| ADORA1          | 148    | THBD            | 23     |
| OPRD1           | 147    | ADA             | 21     |
| ADRA2A          | 146    | KRT8            | 21     |
| OPRK1           | 146    | ACE2            | 17     |
| ADRA2C          | 145    | SERPINA5        | 17     |
| ADRA2B          | 145    | KCNMA1          | 16     |
| P2RY12          | 144    | PAH             | 16     |
| CHRM1           | 140    | MTHFR           | 16     |
| CREB1           | 138    | NID1            | 16     |
| ITGB2           | 135    | GABRG2          | 15     |
| ADRA1B          | 132    | SLC12A2         | 14     |
| ADRA1D          | 130    | TFPI            | 14     |
| CHRM5           | 128    | CES1            | 14     |
| TLR4            | 127    | GABRB2          | 12     |
| MMP9            | 125    | CACNA2D2        | 12     |
| MMP2            | 123    | SERPINB2        | 11     |
| SERPINE1        | 112    | KCNE1           | 11     |
| ITGA4           | 112    | GABRB1          | 11     |
| BCL2            | 109    | CA9             | 11     |
| ITGA2B          | 105    | FXYP2           | 10     |

|          |     |         |    |
|----------|-----|---------|----|
| CXCL12   | 102 | GABRA2  | 10 |
| F2       | 96  | GABRA3  | 10 |
| ADRB2    | 94  | GABRA5  | 10 |
| NT5E     | 92  | GABRA1  | 10 |
| PLG      | 91  | GABRB3  | 10 |
| PLAU     | 89  | GABRG3  | 10 |
| CANX     | 88  | AKR1C1  | 9  |
| TSPO     | 83  | SCNN1B  | 9  |
| ADRB1    | 82  | ATP1A1  | 8  |
| ADRB3    | 79  | ST14    | 8  |
| CFTR     | 76  | SAA1    | 8  |
| PDE4A    | 74  | PDXK    | 7  |
| PLAUR    | 73  | SCNN1A  | 7  |
| FGA      | 72  | MMAA    | 7  |
| ADORA2A  | 71  | AQP1    | 7  |
| NOS2     | 68  | ADRA1A  | 7  |
| APOE     | 66  | SLC12A3 | 6  |
| SERPINC1 | 65  | SCNN1G  | 6  |
| KCNQ1    | 61  | SLC12A1 | 6  |
| CALR     | 61  | NR3C2   | 6  |
| PDE1A    | 61  | CA4     | 5  |
| PDE4B    | 60  | HRH1    | 5  |
| PDE1B    | 60  | MTRR    | 5  |
| SELP     | 59  | MMACHC  | 5  |
| ABCA1    | 58  | ACCN1   | 4  |
| PDE3A    | 58  | VKORC1  | 4  |
| CACNA1S  | 56  | FABP2   | 4  |
| AMBP     | 55  | GABRR2  | 4  |
| CACNA1C  | 54  | CA3     | 4  |
| ITGAL    | 53  | GABRR1  | 3  |
| PDE10A   | 53  | SCNN1D  | 3  |
| AHR      | 51  | CA7     | 3  |
| CACNA1G  | 50  | CA1     | 2  |
| CACNA1D  | 48  | ACCN2   | 2  |
| CACNA1F  | 47  | CLEC3B  | 2  |
| PTGS1    | 45  | GABRR3  | 2  |
| CACNB1   | 45  | SLC12A5 | 1  |
| CACNG1   | 45  | CA12    | 1  |
| ANXA2    | 45  | GABRE   | 1  |
| CACNB4   | 45  | GABRD   | 1  |

**Table S8. Enriched Reactome pathway of the 10 significant modules.** Here we list the highly enriched pathways of 10 classic module. PV and CPV respectively are P-value and Corrected P-value. And the in the time line we annotated the time of the events occur in ischemic cascade. “s”, “m”, “h”, “d”, “w”, “M” and “y” respectively mean second, minutes, hours, days, weeks, months and years.

| Module | Pathway                                                                             | PV       | CPV      | Time frame |
|--------|-------------------------------------------------------------------------------------|----------|----------|------------|
| 58     | Glycerophospholipid biosynthesis                                                    | 1.82E-39 | 7.07E-42 | mhdwM      |
| 58     | Acyl chain remodelling of PC                                                        | 4.74E-28 | 6.92E-30 |            |
| 58     | Acyl chain remodelling of PE                                                        | 1.86E-23 | 3.71E-25 |            |
| 58     | Synthesis of Leukotrienes (LT) and Eoxins (EX)                                      | 3.47E-14 | 1.18E-15 | mh         |
| 58     | Hydrolysis of LPC                                                                   | 2.70E-08 | 1.42E-09 | mh         |
| 64     | Activation of NMDA receptor upon glutamate binding and postsynaptic events          | 1.73E-20 | 1.36E-18 | mh         |
| 64     | Glutamate Binding, Activation of AMPA Receptors and Synaptic Plasticity             | 3.54E-20 | 2.63E-18 | smh        |
| 64     | Trafficking of AMPA receptors                                                       | 3.54E-20 | 2.63E-18 | hd         |
| 64     | Unblocking of NMDA receptor, glutamate binding and activation                       | 4.17E-19 | 2.99E-17 | mh         |
| 64     | Depolarization of the Presynaptic Terminal Triggers the Opening of Calcium Channels | 1.22E-15 | 6.96E-14 | mh         |
| 94     | Toll-Like Receptors Cascades                                                        | 2.00E-19 | 6.94E-23 | hdw        |
| 94     | MyD88:Mal cascade initiated on plasma membrane                                      | 2.10E-14 | 5.85E-17 | mh         |

|     |                                                                                             |          |          |      |
|-----|---------------------------------------------------------------------------------------------|----------|----------|------|
| 94  | Toll Like Receptor TLR6:TLR2 Cascade                                                        | 2.10E-14 | 5.85E-17 | hdw  |
| 94  | Toll Like Receptor TLR1:TLR2 Cascade                                                        | 3.09E-14 | 1.02E-16 | hdw  |
| 94  | Toll Like Receptor 2 (TLR2) Cascade                                                         | 3.09E-14 | 1.02E-16 | hdw  |
| 94  | Interleukin-1 signaling                                                                     | 2.09E-12 | 9.94E-15 | hd   |
| 97  | Cytokine Signaling in Immune system                                                         | 7.86E-07 | 2.80E-08 | hd   |
| 97  | Interleukin receptor SHC signaling                                                          | 0.000191 | 1.20E-05 | hd   |
| 97  | Activation of the AP-1 family of transcription factors                                      | 0.000381 | 2.58E-05 | sh   |
| 97  | G beta:gamma signalling through PI3Kgamma                                                   | 0.001171 | 8.91E-05 |      |
| 97  | Platelet activation, signaling and aggregation                                              | 0.001221 | 9.36E-05 |      |
| 103 | Nucleotide-binding domain, leucine rich repeat containing receptor (NLR) signaling pathways | 2.88E-12 | 3.41E-14 | mh   |
| 103 | Nucleotide-binding domain, leucine rich repeat containing receptor (NLR) signaling pathways | 2.88E-12 | 3.41E-14 | mhw  |
| 103 | BH3-only proteins associate with and inactivate anti-apoptotic BCL-2 members                | 6.07E-12 | 7.48E-14 | mhw  |
| 103 | Activation of BH3-only proteins                                                             | 1.14E-10 | 1.92E-12 | mhw  |
| 103 | Apoptotic factor-mediated response                                                          | 9.13E-09 | 2.04E-10 | mhw  |
| 121 | Signaling by NOTCH1                                                                         | 1.38E-25 | 4.95E-28 | dwMy |

|     |                                                                         |          |          |       |
|-----|-------------------------------------------------------------------------|----------|----------|-------|
| 121 | Signaling by NOTCH1                                                     | 1.38E-25 | 4.95E-28 | dwMy  |
| 121 | Signaling by NOTCH1 HD+PEST Domain Mutants in Cancer                    | 1.38E-25 | 4.95E-28 |       |
| 121 | Activated NOTCH1 Transmits Signal to the Nucleus                        | 7.51E-25 | 2.96E-27 | dwMy  |
| 121 | Signaling by NOTCH2                                                     | 7.51E-23 | 4.04E-25 | dwMy  |
| 193 | Formation of Fibrin Clot (Clotting Cascade)                             | 1.24E-31 | 1.80E-34 |       |
| 193 | Gamma-carboxylation, transport, and amino-terminal cleavage of proteins | 7.50E-15 | 1.06E-16 |       |
| 193 | Removal of aminoterminal propeptides from gamma-carboxylated proteins   | 2.07E-13 | 3.52E-15 |       |
| 193 | Gamma-carboxylation of protein precursors                               | 2.07E-13 | 3.52E-15 |       |
| 193 | Dissolution of Fibrin Clot                                              | 1.61E-12 | 2.90E-14 |       |
| 194 | Metabolism of Angiotensinogen to Angiotensins                           | 6.69E-11 | 3.79E-14 |       |
| 194 | Peptide hormone metabolism                                              | 6.64E-08 | 3.01E-10 | mhd   |
| 194 | Degradation of the extracellular matrix                                 | 0.005496 | 0.000193 | hwM   |
| 194 | Activation of Matrix Metalloproteinases                                 | 0.010589 | 0.000438 | hd    |
| 194 | Extracellular matrix organization                                       | 0.032326 | 0.002071 | hdwMy |
| 202 | HDL-mediated lipid transport                                            | 1.37E-06 | 4.42E-08 | hdwMy |
| 202 | Retinoid metabolism and transport                                       | 1.79E-06 | 6.21E-08 | hd    |
| 202 | Binding and Uptake of Ligands by Scavenger Receptors                    | 4.91E-05 | 2.86E-06 | hdwM  |

|     |                                                           |          |          |       |
|-----|-----------------------------------------------------------|----------|----------|-------|
| 202 | Formation of Fibrin Clot (Clotting Cascade)               | 4.91E-05 | 2.86E-06 |       |
| 202 | Scavenging of heme from plasma                            | 8.10E-05 | 5.00E-06 |       |
| 202 | GRB2:SOS provides linkage to MAPK signaling for Integrins | 0.004614 | 0.000519 | hd    |
| 244 | Tie2 Signaling                                            | 3.08E-11 | 2.92E-14 | hdwMy |
| 244 | Cell surface interactions at the vascular wall            | 2.63E-07 | 1.66E-09 | hd    |
| 244 | NGF signalling via TRKA from the plasma membrane          | 3.69E-05 | 5.13E-07 | hdwMy |
| 244 | NCAM signaling for neurite out-growth                     | 3.69E-05 | 5.24E-07 | hdwMy |
| 244 | IGF1R signaling cascade                                   | 7.78E-05 | 1.50E-06 | hdwMy |

**Table S9. M64 Reactome Pathway analysis.** There are 81 enriched pathways. 53 pathways involved in the process of ischemic stroke. These events can appear in the stages in minutes(m), hours(h), days(d), weeks(w), month(M) or years(y). The stage a pathways involved is displayed in the “Timing”. And “Unblocking of NMDA receptor, glutamate binding and activation” is the significant pathway of M64.<sup>19</sup>

20

| Pathway                                                                    | PV       | CPV      | Time frame |
|----------------------------------------------------------------------------|----------|----------|------------|
| Activation of NMDA receptor upon glutamate binding and postsynaptic events | 1.73E-20 | 1.36E-18 | mh         |
| Glutamate Binding, Activation of AMPA Receptors and Synaptic Plasticity    | 3.54E-20 | 2.63E-18 | smh        |
| Trafficking of AMPA receptors                                              | 3.54E-20 | 2.63E-18 | hd         |



|                                                                                     |          |          |      |
|-------------------------------------------------------------------------------------|----------|----------|------|
| Unblocking of NMDA receptor, glutamate binding and activation                       | 4.17E-19 | 2.99E-17 | mh   |
| Depolarization of the Presynaptic Terminal Triggers the Opening of Calcium Channels | 1.22E-15 | 6.96E-14 | mh   |
| Post NMDA receptor activation events                                                | 1.62E-15 | 8.97E-14 | mh   |
| Ras activation upon Ca <sup>2+</sup> influx through NMDA receptor                   | 4.55E-14 | 2.27E-12 | mh   |
| CREB phosphorylation through the activation of CaMKII                               | 5.85E-13 | 2.78E-11 | mh   |
| CREB phosphorylation through the activation of Ras                                  | 1.72E-12 | 7.69E-11 | mh   |
| Integration of energy metabolism                                                    | 2.59E-11 | 1.01E-09 | m    |
| NCAM1 interactions                                                                  | 8.29E-10 | 2.84E-08 | h    |
| Rap1 signalling                                                                     | 6.49E-09 | 1.97E-07 | hd   |
| NCAM signaling for neurite out-growth                                               | 7.11E-08 | 1.84E-06 | dwMy |
| PKA activation                                                                      | 2.28E-07 | 5.62E-06 | mh   |
| PKA activation in glucagon signalling                                               | 3.06E-07 | 7.43E-06 | mh   |
| PKA-mediated phosphorylation of CREB                                                | 3.06E-07 | 7.43E-06 | mh   |
| Ca <sup>2+</sup> activated K <sup>+</sup> channels                                  | 5.35E-07 | 1.20E-05 | m    |
| Calmodulin induced events                                                           | 3.62E-06 | 6.79E-05 | h    |
| CaM pathway                                                                         | 3.62E-06 | 6.79E-05 | h    |
| Ca-dependent events                                                                 | 5.14E-06 | 9.32E-05 | h    |
| cGMP effects                                                                        | 6.48E-06 | 0.000114 | h    |
| Transmembrane transport of small molecules                                          | 7.07E-06 | 0.000124 | h    |
| Aquaporin-mediated transport                                                        | 7.76E-06 | 0.000132 | h    |

|                                                                    |          |          |      |
|--------------------------------------------------------------------|----------|----------|------|
| DAG and IP3 signaling                                              | 8.34E-06 | 0.00014  | h    |
| Potassium Channels                                                 | 8.89E-06 | 0.000148 | mh   |
| EGFR interacts with phospholipase C-gamma                          | 1.12E-05 | 0.000183 | h    |
| PLC-gamma1 signalling                                              | 1.12E-05 | 0.000183 | h    |
| Axon guidance                                                      | 1.30E-05 | 0.000207 | dwMy |
| HSF1-dependent transactivation                                     | 1.89E-05 | 0.000294 | h    |
| Nitric oxide stimulates guanylate cyclase                          | 2.27E-05 | 0.000348 | h    |
| Activation of Ca-permeable Kainate Receptor                        | 3.83E-05 | 0.000554 | h    |
| Ionotropic activity of Kainate Receptors                           | 3.83E-05 | 0.000554 | mh   |
| Hormone-sensitive lipase (HSL)-mediated triacylglycerol hydrolysis | 3.83E-05 | 0.000554 | d    |
| Trafficking of GluR2-containing AMPA receptors                     | 3.83E-05 | 0.000554 | hd   |
| PLC beta mediated events                                           | 4.05E-05 | 0.000583 | mh   |
| G-protein mediated events                                          | 4.54E-05 | 0.000645 | hd   |
| Phospholipase C-mediated cascade                                   | 6.26E-05 | 0.000867 | mh   |
| PKA-mediated phosphorylation of key metabolic factors              | 0.000102 | 0.001355 | h    |
| Cellular response to heat stress                                   | 0.000191 | 0.002408 | h    |
| CREB phosphorylation through the activation of Adenylate Cyclase   | 0.000215 | 0.002687 | h    |
| Opioid Signalling                                                  | 0.000828 | 0.008484 | hd   |
| Inwardly rectifying K <sup>+</sup> channels                        | 0.000913 | 0.00917  | mh   |
| Activation of Kainate Receptors upon glutamate binding             | 0.001017 | 0.010062 | mh   |

|                                                  |          |          |       |
|--------------------------------------------------|----------|----------|-------|
| Developmental Biology                            | 0.001263 | 0.011948 | dwMy  |
| Downstream signaling of activated FGFR           | 0.002011 | 0.017725 | hd    |
| Stimuli-sensing channels                         | 0.002059 | 0.01809  | hd    |
| Lipid digestion, mobilization, and transport     | 0.002167 | 0.018795 | h     |
| Signaling by FGFR                                | 0.003062 | 0.025326 | hd    |
| NGF signalling via TRKA from the plasma membrane | 0.003669 | 0.029059 | hdwMy |
| Hedgehog 'off' state                             | 0.003683 | 0.029059 | h     |
| NrCAM interactions                               | 0.00524  | 0.038775 | h     |
| Signaling by FGFR in disease                     | 0.005454 | 0.040059 | h     |
| Ion channel transport                            | 0.006766 | 0.046636 | hd    |

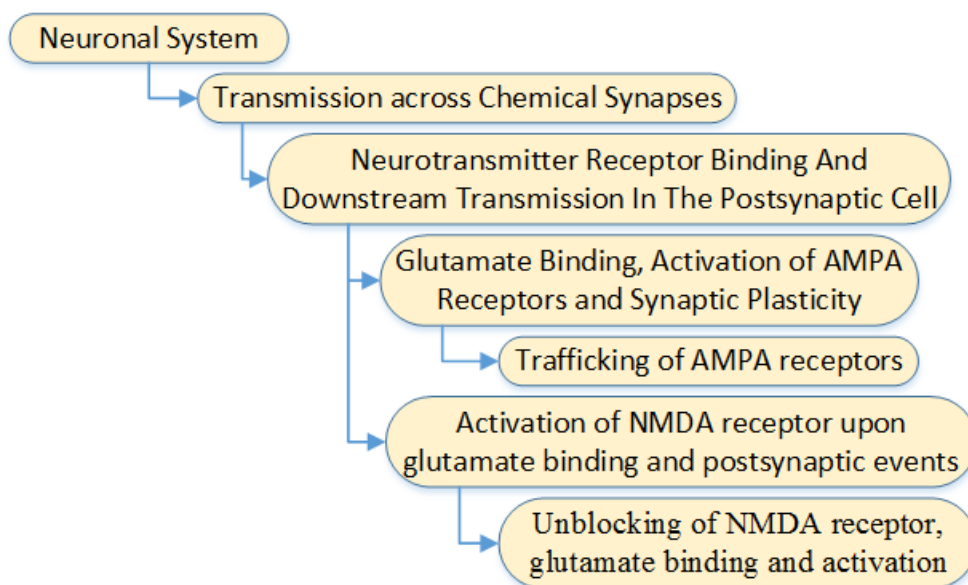

**Figure S2. The tree of Reactome pathways of M64.** There shows the including and included relationships of enriched Reactome pathways of M64.

**Table S10. M145 Reactome Pathway analysis.** There are 28 enriched pathways. The 20 pathways in red are shared with the analysis result of credible genes. The most highly enriched pathway “G alpha (i) signalling events” is significant pathway of M145.

| Pathway                                                                     | PV         | CPV        | Time frame |
|-----------------------------------------------------------------------------|------------|------------|------------|
| G alpha (i) signalling events                                               | 2.49E-119  | 8.99E-116  | mh         |
| Class A/1 (Rhodopsin-like receptors)                                        | 1.78E-97   | 3.21E-94   |            |
| Defective ACTH causes Obesity and Pro-opiomelanocortinin deficiency (POMCD) | 1.94E-84   | 1.75E-81   |            |
| GPCR ligand binding                                                         | 1.94E-84   | 1.75E-81   | mh         |
| Metabolic disorders of biological oxidation enzymes                         | 2.08E-71   | 1.50E-68   | m          |
| Peptide ligand-binding receptors                                            | 1.51E-67   | 9.10E-65   | m          |
| GPCR downstream signaling                                                   | 1.40E-63   | 7.23E-61   | mh         |
| Signaling by GPCR                                                           | 1.82E-59   | 7.32E-57   | mh         |
| Signal Transduction                                                         | 7.81E-33   | 1.66E-30   |            |
| Chemokine receptors bind chemokines                                         | 2.81E-32   | 5.63E-30   | h          |
| Amine ligand-binding receptors                                              | 3.07E-16   | 1.73E-14   |            |
| Serotonin receptors                                                         | 2.13E-07   | 3.82E-06   | mh         |
| Nucleotide-like (purinergic) receptors                                      | 8.11E-07   | 1.24E-05   |            |
| Lysosphingolipid and LPA receptors                                          | 1.56E-06   | 2.33E-05   |            |
| G alpha (z) signalling events                                               | 1.71E-05   | 0.00020565 | mh         |
| Activation of C3 and C5                                                     | 2.54E-05   | 0.00029046 | hd         |
| P2Y receptors                                                               | 8.89E-05   | 0.00087765 | dwMy       |
| Dopamine receptors                                                          | 0.00019433 | 0.00169135 | h          |
| Alternative complement activation                                           | 0.00019433 | 0.00169135 | dwMy       |
| Formyl peptide receptors bind formyl peptides and many other ligands        | 0.00040689 | 0.00312696 |            |
| Adrenoceptors                                                               | 0.00072891 | 0.00514766 |            |

|                                     |            |            |      |
|-------------------------------------|------------|------------|------|
| Regulation of Complement cascade    | 0.00098933 | 0.00658094 | dwMy |
| Eicosanoid ligand-binding receptors | 0.00252302 | 0.01446533 |      |
| Complement cascade                  | 0.00397903 | 0.02080628 | dwMy |
| Muscarinic acetylcholine receptors  | 0.00475556 | 0.02426144 |      |
| Initial triggering of complement    | 0.00517063 | 0.02599931 | dwMy |

**Table S11. Novel drugs about neuroprotection of AIS.** “Action” means the interaction between drugs and targets. Based on the analysis of M64, There are 21 potential drugs. And 25 potential drugs are screened out based on M145 analysis.

| Module      | Potential Targets | Action     | Novel Drugs                                                                                                                                                          |
|-------------|-------------------|------------|----------------------------------------------------------------------------------------------------------------------------------------------------------------------|
| <b>M64</b>  | CAMK2G            | inhibitor  | Bosutinib                                                                                                                                                            |
|             | GRIA1             | antagonist | Perampanel, Enflurane, Isoflurane, Desflurane, Sevoflurane, Methoxyflurane                                                                                           |
|             | GRIA2             | antagonist | Hexobarbital, Heptobarbital, Methylphenobarbital, Quinidine barbiturate, Primidone, Pentobarbital, Phenobarbital, Thiopental, Secobarbital                           |
|             | GRIN1             | antagonist | Orphenadrine, Pethidine                                                                                                                                              |
|             | GRIN2A            | antagonist | Halothane, Memantine, Felbamate, Pethidine                                                                                                                           |
| <b>M145</b> | ADORA3            | agonist    | Adenosine                                                                                                                                                            |
|             | DRD2              | agonist    | Amantadine, Apomorphine, Bromocriptine, Cabergoline, Dopamine, Ergotamine, Ketamine, Levodopa, Lisuride, Minaprine, Pramipexole, Ropinirole, Rotigotine              |
|             | HTR1A             | agonist    | Apomorphine, Bromocriptine, Cabergoline, Cinitapride, Eletriptan, Lisuride, Methysergide, Naratriptan, Ropinirole, Rotigotine, Sumatriptan, Vilazodone, Zolmitriptan |
|             | HTR1D             | agonist    | Almotriptan, Apomorphine, Bromocriptine, Cabergoline, Dihydroergotamine, Eletriptan, Ergotamine, Frovatriptan,                                                       |

|  |       |         |                                                                           |
|--|-------|---------|---------------------------------------------------------------------------|
|  |       |         | Lisuride, Naratriptan, Rizatriptan, Ropinirole, Sumatriptan, Zolmitriptan |
|  | HTR1E | agonist | Eletriptan                                                                |
|  | HTR1F | agonist | Eletriptan, Naratriptan, Rizatriptan, Sumatriptan, Zolmitriptan           |

In addition, there are additional supplementary data files as following, all of which will be supplied if necessary.

**Data S1. Identified disease-gene relationships of AIS from Coremine**

**Data S2. The nodes in 29 modules (OR>2).**

**Data S3. GO analysis of AIS confirmed genes**

**Data S4.GO analysis of AIS existing drug targets.**

**Data S5. GO analysis of 29(OR>2) AIS related modules.**

**Data S6. Pathway analysis of AIS drug targets.**

**Data S7. Pathway analysis of 29 AIS related modules.**

## Reference

1. Jenssen, T.K., et al., A literature network of human genes for high-throughput analysis of gene expression. *Nat Genet* **28** 21-28 (2001).
2. Amberger, J.S., et al., OMIM.org: Online Mendelian Inheritance in Man (OMIM(R)), an online catalog of human genes and genetic disorders. *Nucleic Acids Res* **43** D789-798 (2015).
3. Liu, C.C., et al., DiseaseConnect: a comprehensive web server for mechanism-based disease-disease connections. *Nucleic Acids Res* **42** W137-146 (2014).
4. Franceschini, A., et al., STRING v9.1: protein-protein interaction networks, with increased coverage and integration. *Nucleic Acids Res* **41** D808-815 (2013).
5. Andrus, B. and D. Lacaille, 2013 ACC/AHA guideline on the assessment of cardiovascular risk. *J Am Coll Cardiol* **63** 2886 (2013).
6. Jauch, E.C., et al., Guidelines for the early management of patients with acute ischemic stroke: a guideline for healthcare professionals from the American Heart Association/American Stroke Association. *Stroke* **44** 870-947 (2013).

7. Kernan, W.N., et al., Guidelines for the prevention of stroke in patients with stroke and transient ischemic attack: a guideline for healthcare professionals from the American Heart Association/American Stroke Association. *Stroke* **45** 2160-2236 (2014).
8. Law, V., et al., DrugBank 4.0: shedding new light on drug metabolism. *Nucleic Acids Res* **42** D1091-1097 (2014).
9. Dittrich, M.T., et al., Identifying functional modules in protein-protein interaction networks: an integrated exact approach. *Bioinformatics* **24** i223-231 (2008).
10. Blondel V D, G.J.L., Lambiotte R, et al., Fast unfolding of communities in large networks. *Journal of Statistical Mechanics: Theory and Experiment* **10** P10008 (2008).
11. Ashburner, M., et al., Gene ontology: tool for the unification of biology. The Gene Ontology Consortium. *Nat Genet* **25** 25-29 (2000).
12. Wang, J., et al., NOA: a novel Network Ontology Analysis method. *Nucleic Acids Res* **39** e87 (2011).
13. Maere, S., K. Heymans, and M. Kuiper, BiNGO: a Cytoscape plugin to assess overrepresentation of gene ontology categories in biological networks. *Bioinformatics* **21** 3448-3449 (2005).
14. Smoot, M.E., et al., Cytoscape 2.8: new features for data integration and network visualization. *Bioinformatics* **27** 431-432 (2011).
15. Xie, C., et al., KOBAS 2.0: a web server for annotation and identification of enriched pathways and diseases. *Nucleic Acids Res* **39** W316-322 (2011).
16. Zhou, X., et al., Human symptoms-disease network. *Nat Commun* **5** 4212 (2014).
17. Cormen, T.H., Introduction to algorithms. *MIT press* (2001).
18. Christina G. Towers, A.L.G., Doug S. Micalizzi, w, J. Chuck Harrell, w, Austin E. Gillen,, C.-A.W. Jihye Kim, w, Michael U.J. Oliphant, David J. Drasin, w, Michelle A. Guney, Peter Kabos,, and A.-C.T. Carol A. Sartorius, Charles M. Perou, Joaquin M. Espinosa, Heide L. Ford, The Six1 oncoprotein downregulates p53 via concomitant regulation of RPL26 and microRNA-27a-3p. *Nat Commun* **10.1038** (2015).
19. Barone, F.C. and G.Z. Feuerstein, Inflammatory mediators and stroke: new opportunities for novel therapeutics. *J Cereb Blood Flow Metab* **19** 819-834 (1999).
20. Saenger, A.K. and R.H. Christenson, Stroke biomarkers: progress and challenges for diagnosis, prognosis, differentiation, and treatment. *Clin Chem* **56** 21-33 (2010).
